# Supplementary material for: A TP53-based immune prognostic model for muscle-invasive bladder cancer
Source: PubMed Central journal article supplement (PMC7880361; doi:10.18632/aging.202150), 2020-12-15
Supplement: aging-13-202150-s002.pdf [file aging-13-202150-s002.pdf]

## SUPPLEMENTARY TABLES

**Supplementary Table 2. Differentially expressed immune-related genes between TP53 WT and TP53 MUT MIBCs.**

| Gene     | BaseMean    | Log2FoldChange | lfcSE    | Stat     | P value    | Padj      |
|----------|-------------|----------------|----------|----------|------------|-----------|
| INPP5D   | 1854.711104 | -1.331192711   | 0.109912 | -12.1115 | 9.19E-34   | 5.73E-30  |
| MUC17    | 6.785766424 | 3.423430873    | 0.403068 | 8.493431 | 2.01E-17   | 1.39E-14  |
| COLEC10  | 16.41223701 | -1.518229034   | 0.19155  | -7.92602 | 2.26E-15   | 1.09E-12  |
| MUC3A    | 386.6954841 | -1.666152055   | 0.222744 | -7.48011 | 7.43E-14   | 2.32E-11  |
| KRT1     | 666.6288899 | 2.256194309    | 0.315835 | 7.143583 | 9.09E-13   | 1.87E-10  |
| IL13RA2  | 114.8086152 | 1.381038267    | 0.199597 | 6.919142 | 4.54E-12   | 6.69E-10  |
| KLK5     | 639.2089362 | 3.012235524    | 0.447785 | 6.726965 | 1.73E-11   | 2.00E-09  |
| ITLN1    | 314.1628376 | 2.063811109    | 0.322884 | 6.391796 | 1.64E-10   | 1.30E-08  |
| MUC13    | 39.3318094  | 1.689564373    | 0.26715  | 6.3244   | 2.54E-10   | 1.88E-08  |
| TNF      | 74.05026623 | 1.076075988    | 0.173247 | 6.21122  | 5.26E-10   | 3.37E-08  |
| TRIM15   | 14.85020364 | 1.796347117    | 0.291317 | 6.1663   | 6.99E-10   | 4.25E-08  |
| MUC2     | 1073.476454 | -1.872285676   | 0.308671 | -6.06564 | 1.31E-09   | 6.97E-08  |
| FCER2    | 41.01428292 | -1.629011171   | 0.270628 | -6.01938 | 1.75E-09   | 8.67E-08  |
| F2       | 18.10754493 | -1.539812425   | 0.264972 | -5.81122 | 6.20E-09   | 2.50E-07  |
| TMEM178A | 127.5392241 | -1.005751905   | 0.173451 | -5.79849 | 6.69E-09   | 2.68E-07  |
| PRSS2    | 294.2979381 | -1.951340192   | 0.33999  | -5.73941 | 9.50E-09   | 3.60E-07  |
| MUCL1    | 47.38242697 | -1.433814436   | 0.254758 | -5.62814 | 1.82E-08   | 6.15E-07  |
| MUC6     | 27.50267307 | 1.281605722    | 0.232651 | 5.508708 | 3.61E-08   | 1.11E-06  |
| BMP5     | 146.0012169 | -1.313917978   | 0.251061 | -5.23347 | 1.66E-07   | 3.96E-06  |
| CXCL5    | 492.5128235 | 1.447470474    | 0.277447 | 5.217111 | 1.82E-07   | 4.28E-06  |
| MUC21    | 48.10028086 | 1.57242524     | 0.304889 | 5.157366 | 2.50E-07   | 5.67E-06  |
| CRP      | 7.047758192 | 1.768788946    | 0.350343 | 5.048736 | 4.45E-07   | 9.10E-06  |
| ELANE    | 5.561058025 | -1.156174197   | 0.234959 | -4.92074 | 8.62E-07   | 1.56E-05  |
| CTSG     | 116.8657596 | -1.173494097   | 0.240986 | -4.86956 | 1.12E-06   | 1.95E-05  |
| RAET1L   | 65.33216009 | 1.125183807    | 0.236677 | 4.754085 | 1.99E-06   | 3.10E-05  |
| PI3      | 6530.207297 | 1.496468891    | 0.314881 | 4.752485 | 2.01E-06   | 3.11E-05  |
| PAK3     | 51.24237471 | 1.028488952    | 0.22018  | 4.67113  | 3.00E-06   | 4.27E-05  |
| BPIFA2   | 9.044188556 | -1.552672656   | 0.341593 | -4.54539 | 5.48E-06   | 7.01E-05  |
| IL36RN   | 208.5455292 | 1.195186363    | 0.265789 | 4.496741 | 6.90E-06   | 8.43E-05  |
| TREML4   | 3.035898091 | 1.196997555    | 0.266379 | 4.493596 | 7.00E-06   | 8.55E-05  |
| LBP      | 56.44304651 | -1.060024831   | 0.238228 | -4.44962 | 8.60E-06   | 0.0001015 |
| PGLYRP4  | 158.3369183 | 1.131984695    | 0.255716 | 4.42672  | 9.57E-06   | 0.0001109 |
| ZP4      | 1.384827197 | 2.740193555    | 0.675698 | 4.055351 | 5.01E-05   | 0.000433  |
| C4BPA    | 11.83703756 | 1.11824931     | 0.281722 | 3.96933  | 7.21E-05   | 0.0005837 |
| ADIPOQ   | 41.22982002 | -1.880092603   | 0.482849 | -3.89375 | 9.87E-05   | 0.0007568 |
| MS4A1    | 199.7270789 | -1.058261639   | 0.272528 | -3.88314 | 0.00010312 | 0.0007833 |
| IFNK     | 4.438731702 | 1.844122551    | 0.475738 | 3.876338 | 0.00010604 | 0.0008006 |

|       |             |              |          |          |            |           |
|-------|-------------|--------------|----------|----------|------------|-----------|
| PPBP  | 16.3034348  | 1.010430324  | 0.262607 | 3.847685 | 0.00011924 | 0.0008795 |
| CR2   | 180.5723803 | -1.145738436 | 0.298234 | -3.84174 | 0.00012216 | 0.0008956 |
| ACOD1 | 3.209527907 | 1.098973015  | 0.293156 | 3.748769 | 0.00017771 | 0.0012264 |
| IL2   | 1.674166645 | -1.037857916 | 0.302595 | -3.42986 | 0.00060389 | 0.0033249 |
| KLK3  | 31.97130664 | -1.573014493 | 0.480084 | -3.27654 | 0.00105086 | 0.0052178 |
| KLRF2 | 2.275614677 | -1.023321575 | 0.317905 | -3.21895 | 0.00128661 | 0.0061484 |
| SEMG2 | 5.609722123 | -1.119485718 | 0.359992 | -3.10975 | 0.00187245 | 0.0083153 |

**Supplementary Table 3. Univariate Cox regression analysis of differentially expressed immune-related genes.**

| Gene     | HR        | Z           | Pvalue      | Lower      | Upper      |
|----------|-----------|-------------|-------------|------------|------------|
| BPIFA2   | 0.4793007 | -3.19996146 | 0.00137446  | 0.30547927 | 0.75202865 |
| KRT1     | 1.0945601 | 3.04094672  | 0.002358356 | 1.03263949 | 1.16019369 |
| CTSG     | 1.1596203 | 2.56126922  | 0.01042905  | 1.03537893 | 1.29877008 |
| TREML4   | 2.0823697 | 2.51592625  | 0.011872002 | 1.17596396 | 3.68741213 |
| ELANE    | 1.7211129 | 2.51353421  | 0.011952818 | 1.12702529 | 2.6283612  |
| MUC2     | 0.9028762 | -2.36875478 | 0.017848083 | 0.82968624 | 0.98252244 |
| TMEM178A | 0.8130005 | -2.15627734 | 0.031062015 | 0.67354587 | 0.98132852 |
| PPBP     | 1.2036616 | 2.0668929   | 0.038744246 | 1.009636   | 1.43497394 |
| RAET1L   | 1.157798  | 2.04852701  | 0.040508388 | 1.00635453 | 1.33203172 |
| F2       | 0.7377252 | -1.95931492 | 0.050075918 | 0.54418364 | 1.00010077 |
| ADIPOQ   | 1.1276578 | 1.94118714  | 0.052235583 | 0.99883855 | 1.27309078 |
| ITLN1    | 0.9045497 | -1.90481201 | 0.056804512 | 0.81583703 | 1.00290883 |
| PI3      | 1.0391878 | 1.67985532  | 0.092985468 | 0.99361088 | 1.08685542 |
| C4BPA    | 0.791979  | -1.64174983 | 0.10064186  | 0.59950851 | 1.04624152 |
| INPP5D   | 0.9110958 | -1.53367692 | 0.125109154 | 0.80888886 | 1.02621703 |
| IFNK     | 0.7252585 | -1.51608925 | 0.129496787 | 0.47878587 | 1.09861207 |
| SEMG2    | 0.7812814 | -1.49614551 | 0.134615741 | 0.56543718 | 1.07951985 |
| IL36RN   | 1.077922  | 1.49606391  | 0.134637001 | 0.97700168 | 1.1892669  |
| KLK5     | 1.0503211 | 1.4414847   | 0.149447798 | 0.98249599 | 1.12282836 |
| TNF      | 0.8800157 | -1.36851191 | 0.171151896 | 0.73280819 | 1.05679436 |
| PGLYRP4  | 1.0777881 | 1.29292472  | 0.196037095 | 0.96208966 | 1.20740004 |
| ACOD1    | 0.6651285 | -1.26478914 | 0.205946925 | 0.35356848 | 1.25123139 |
| CRP      | 0.8223409 | -1.24966551 | 0.211421761 | 0.60509001 | 1.11759319 |
| MUC21    | 1.0778289 | 1.20902356  | 0.226653794 | 0.95451528 | 1.21707329 |
| ZP4      | 1.2053951 | 1.03709029  | 0.29969378  | 0.84684805 | 1.71574751 |
| CR2      | 1.0445565 | 1.00597241  | 0.314428844 | 0.95950299 | 1.13714938 |
| KLRF2    | 0.7381797 | -0.86563715 | 0.386689174 | 0.37124151 | 1.46780272 |
| TRIM15   | 0.8997109 | -0.80566634 | 0.42043526  | 0.69574183 | 1.16347699 |
| CXCL5    | 1.0324815 | 0.69564429  | 0.486651619 | 0.94355936 | 1.12978379 |
| LBP      | 0.9502898 | -0.67822945 | 0.49762622  | 0.82009479 | 1.10115414 |
| MUC17    | 0.9070841 | -0.6713751  | 0.501981605 | 0.68234945 | 1.205836   |

|         |           |             |             |            |            |
|---------|-----------|-------------|-------------|------------|------------|
| MUC3A   | 0.9750718 | -0.50184944 | 0.615773435 | 0.88352562 | 1.07610343 |
| PRSS2   | 0.9800865 | -0.5000856  | 0.617014804 | 0.90578991 | 1.0604773  |
| BMP5    | 0.9686302 | -0.4442206  | 0.656883099 | 0.84156037 | 1.1148868  |
| COLEC10 | 0.9146062 | -0.441049   | 0.659177525 | 0.61512553 | 1.35989237 |
| MUC6    | 1.0271493 | 0.31456764  | 0.753089952 | 0.86925826 | 1.21371937 |
| PAK3    | 1.0261812 | 0.28366326  | 0.776668449 | 0.85836436 | 1.22680759 |
| MUCL1   | 1.0185821 | 0.26652602  | 0.789834121 | 0.88960086 | 1.16626406 |
| FCER2   | 1.0147179 | 0.20229408  | 0.839686831 | 0.88078    | 1.16902341 |
| MUC13   | 0.9879315 | -0.17040276 | 0.864693405 | 0.85916229 | 1.13600037 |
| IL2     | 1.0557711 | 0.13710304  | 0.890949347 | 0.48598951 | 2.29357335 |
| MS4A1   | 0.9936317 | -0.13361744 | 0.893705091 | 0.90474645 | 1.09124934 |
| IL13RA2 | 1.0082233 | 0.13085062  | 0.895893478 | 0.89182927 | 1.13980812 |
| KLK3    | 1.0003818 | 0.00411676  | 0.996715308 | 0.83412129 | 1.19978215 |

**Supplementary Table 4. Analysis of correlations between risk score and immune checkpoints.**

| Variable 1 | Variable 2 | Pearson correlation coefficient | P value     |
|------------|------------|---------------------------------|-------------|
| CTLA4      | PD1        | 0.888288098                     | 6.21E-139   |
| CTLA4      | TIGIT      | 0.886304303                     | 1.78E-137   |
| CTLA4      | HAVCR2     | 0.831323626                     | 2.32E-105   |
| CTLA4      | LAG3       | 0.844513955                     | 6.75E-112   |
| CTLA4      | riskscore  | 0.186199337                     | 0.000158114 |
| HAVCR2     | PD1        | 0.834320086                     | 8.55E-107   |
| HAVCR2     | TIGIT      | 0.811648076                     | 1.35E-96    |
| HAVCR2     | LAG3       | 0.839543509                     | 2.30E-109   |
| HAVCR2     | riskscore  | 0.179520696                     | 0.000272458 |
| LAG3       | PD1        | 0.87450565                      | 2.44E-129   |
| LAG3       | TIGIT      | 0.804948762                     | 7.60E-94    |
| LAG3       | riskscore  | 0.172904677                     | 0.000458466 |
| PD1        | TIGIT      | 0.887113217                     | 4.56E-138   |
| PD1        | riskscore  | 0.142612516                     | 0.003939071 |
| riskscore  | TIGIT      | 0.201245306                     | 4.32E-05    |
