# Supplementary material for: A TP53-based immune prognostic model for muscle-invasive bladder cancer
Source: Aging (Albany NY). 2020 Dec 15;13(2):1929–46. doi: 10.18632/aging.202150 (PMC7880361; doi:10.18632/aging.202150)
Supplement: Supplementary Table 1 [file aging-13-202150-s001.xlsx]

## Sheet: S1
Supplementary Table 1. Gene enrichment in TP53 MUT MIBCs.
NAME	GS<br> follow link to MSigDB	GS DETAILS	SIZE	ES	NES	NOM p-val	FDR q-val	FWER p-val (Bonferonni adjusted p value)	RANK AT MAX(gene ranking in pathway)	LEADING EDGE
GO_REGULATION_OF_CHROMOSOME_SEGREGATION	GO_REGULATION_OF_CHROMOSOME_SEGREGATION	Details ...	100	0.682794	2.54884	0	0	0	1923	tags=38%, list=10%, signal=42%
GO_MITOTIC_SISTER_CHROMATID_SEGREGATION	GO_MITOTIC_SISTER_CHROMATID_SEGREGATION	Details ...	148	0.637637	2.50814	0	0	0	972	tags=32%, list=5%, signal=34%
GO_CHROMOSOME_SEGREGATION	GO_CHROMOSOME_SEGREGATION	Details ...	305	0.586935	2.50555	0	0	0	3419	tags=40%, list=18%, signal=48%
GO_DNA_DEPENDENT_DNA_REPLICATION	GO_DNA_DEPENDENT_DNA_REPLICATION	Details ...	146	0.622181	2.45168	0	0	0	2922	tags=49%, list=15%, signal=57%
GO_NUCLEAR_CHROMOSOME_SEGREGATION	GO_NUCLEAR_CHROMOSOME_SEGREGATION	Details ...	253	0.58946	2.44974	0	0	0	3419	tags=41%, list=18%, signal=49%
GO_SISTER_CHROMATID_SEGREGATION	GO_SISTER_CHROMATID_SEGREGATION	Details ...	180	0.618205	2.44813	0	0	0	2408	tags=38%, list=12%, signal=43%
GO_CHROMATIN_ASSEMBLY	GO_CHROMATIN_ASSEMBLY	Details ...	157	0.610219	2.42864	0	0	0	2864	tags=34%, list=15%, signal=40%
GO_DNA_PACKAGING	GO_DNA_PACKAGING	Details ...	200	0.590343	2.40949	0	0	0	2458	tags=32%, list=13%, signal=36%
GO_ANTIMICROBIAL_HUMORAL_IMMUNE_RESPONSE_MEDIATED_BY_ANTIMICROBIAL_PEPTIDE	GO_ANTIMICROBIAL_HUMORAL_IMMUNE_RESPONSE_MEDIATED_BY_ANTIMICROBIAL_PEPTIDE	Details ...	73	0.674599	2.40808	0	0	0	1872	tags=36%, list=10%, signal=39%
GO_CHROMATIN_REMODELING_AT_CENTROMERE	GO_CHROMATIN_REMODELING_AT_CENTROMERE	Details ...	46	0.747379	2.40438	0	0	0	3231	tags=61%, list=17%, signal=73%
GO_DNA_REPLICATION_INDEPENDENT_NUCLEOSOME_ORGANIZATION	GO_DNA_REPLICATION_INDEPENDENT_NUCLEOSOME_ORGANIZATION	Details ...	55	0.718705	2.39233	0	0	0	3231	tags=55%, list=17%, signal=65%
GO_DNA_REPLICATION	GO_DNA_REPLICATION	Details ...	271	0.563887	2.38455	0	0	0	2922	tags=41%, list=15%, signal=47%
GO_CENTROMERE_COMPLEX_ASSEMBLY	GO_CENTROMERE_COMPLEX_ASSEMBLY	Details ...	54	0.718101	2.37803	0	0	0	3231	tags=56%, list=17%, signal=66%
GO_ATTACHMENT_OF_SPINDLE_MICROTUBULES_TO_KINETOCHORE	GO_ATTACHMENT_OF_SPINDLE_MICROTUBULES_TO_KINETOCHORE	Details ...	32	0.784419	2.37667	0	0	0	532	tags=44%, list=3%, signal=45%
GO_CELL_CYCLE_DNA_REPLICATION	GO_CELL_CYCLE_DNA_REPLICATION	Details ...	65	0.687427	2.36789	0	0	0	2408	tags=57%, list=12%, signal=65%
GO_MITOTIC_NUCLEAR_DIVISION	GO_MITOTIC_NUCLEAR_DIVISION	Details ...	279	0.555786	2.36534	0	0	0	2560	tags=37%, list=13%, signal=42%
GO_KINETOCHORE_ORGANIZATION	GO_KINETOCHORE_ORGANIZATION	Details ...	21	0.849422	2.34382	0	0	0	1197	tags=57%, list=6%, signal=61%
GO_DNA_REPLICATION_INITIATION	GO_DNA_REPLICATION_INITIATION	Details ...	37	0.764779	2.32844	0	0	0	1741	tags=57%, list=9%, signal=62%
GO_NEGATIVE_REGULATION_OF_CHROMOSOME_SEGREGATION	GO_NEGATIVE_REGULATION_OF_CHROMOSOME_SEGREGATION	Details ...	44	0.733904	2.32509	0	0	0	1923	tags=45%, list=10%, signal=50%
GO_NEGATIVE_REGULATION_OF_METAPHASE_ANAPHASE_TRANSITION_OF_CELL_CYCLE	GO_NEGATIVE_REGULATION_OF_METAPHASE_ANAPHASE_TRANSITION_OF_CELL_CYCLE	Details ...	37	0.747934	2.324	0	0	0	1923	tags=49%, list=10%, signal=54%
GO_REGULATION_OF_CHROMOSOME_SEPARATION	GO_REGULATION_OF_CHROMOSOME_SEPARATION	Details ...	61	0.673122	2.31104	0	0	0	972	tags=34%, list=5%, signal=36%
GO_HISTONE_EXCHANGE	GO_HISTONE_EXCHANGE	Details ...	58	0.684383	2.30839	0	0	0	3231	tags=50%, list=17%, signal=60%
GO_REGULATION_OF_SISTER_CHROMATID_SEGREGATION	GO_REGULATION_OF_SISTER_CHROMATID_SEGREGATION	Details ...	79	0.64785	2.30025	0	0	0	972	tags=30%, list=5%, signal=32%
GO_MEIOTIC_CELL_CYCLE_PROCESS	GO_MEIOTIC_CELL_CYCLE_PROCESS	Details ...	185	0.564824	2.29164	0	0	0	3468	tags=41%, list=18%, signal=50%
GO_CHROMATIN_ASSEMBLY_OR_DISASSEMBLY	GO_CHROMATIN_ASSEMBLY_OR_DISASSEMBLY	Details ...	183	0.568228	2.2828	0	0	0	2864	tags=31%, list=15%, signal=36%
GO_METAPHASE_ANAPHASE_TRANSITION_OF_CELL_CYCLE	GO_METAPHASE_ANAPHASE_TRANSITION_OF_CELL_CYCLE	Details ...	56	0.678192	2.28167	0	0	0	1923	tags=41%, list=10%, signal=45%
GO_NUCLEOSOME_ORGANIZATION	GO_NUCLEOSOME_ORGANIZATION	Details ...	174	0.569645	2.27725	0	0	0	2470	tags=30%, list=13%, signal=34%
GO_DNA_CONFORMATION_CHANGE	GO_DNA_CONFORMATION_CHANGE	Details ...	294	0.535417	2.26885	0	0	0	3557	tags=34%, list=18%, signal=41%
GO_NUCLEAR_DNA_REPLICATION	GO_NUCLEAR_DNA_REPLICATION	Details ...	55	0.68785	2.26637	0	0	0	2241	tags=55%, list=12%, signal=62%
GO_CHROMOSOME_SEPARATION	GO_CHROMOSOME_SEPARATION	Details ...	89	0.618538	2.26414	0	0	0	1686	tags=34%, list=9%, signal=37%
GO_MEIOTIC_CELL_CYCLE	GO_MEIOTIC_CELL_CYCLE	Details ...	247	0.542108	2.24504	0	0	0	3468	tags=40%, list=18%, signal=49%
GO_ORGANELLE_FISSION	GO_ORGANELLE_FISSION	Details ...	456	0.507328	2.23831	0	0	0	3419	tags=37%, list=18%, signal=44%
GO_MEIOTIC_CHROMOSOME_SEGREGATION	GO_MEIOTIC_CHROMOSOME_SEGREGATION	Details ...	88	0.61471	2.23191	0	0	0	3419	tags=42%, list=18%, signal=51%
GO_MEIOSIS_I_CELL_CYCLE_PROCESS	GO_MEIOSIS_I_CELL_CYCLE_PROCESS	Details ...	118	0.573698	2.19455	0	2.94436e-05	0.001	3468	tags=42%, list=18%, signal=50%
GO_MICROTUBULE_CYTOSKELETON_ORGANIZATION_INVOLVED_IN_MITOSIS	GO_MICROTUBULE_CYTOSKELETON_ORGANIZATION_INVOLVED_IN_MITOSIS	Details ...	123	0.565556	2.17188	0	5.53182e-05	0.002	2790	tags=38%, list=14%, signal=44%
GO_DOUBLE_STRAND_BREAK_REPAIR	GO_DOUBLE_STRAND_BREAK_REPAIR	Details ...	237	0.526131	2.18822	0	5.68987e-05	0.002	3547	tags=38%, list=18%, signal=46%
GO_CHROMOSOME_LOCALIZATION	GO_CHROMOSOME_LOCALIZATION	Details ...	75	0.616829	2.15997	0	0.000104946	0.004	2173	tags=32%, list=11%, signal=36%
GO_METAPHASE_PLATE_CONGRESSION	GO_METAPHASE_PLATE_CONGRESSION	Details ...	57	0.645437	2.16345	0	0.000107782	0.004	1834	tags=35%, list=9%, signal=39%
GO_PROTEIN_LOCALIZATION_TO_CHROMOSOME_CENTROMERIC_REGION	GO_PROTEIN_LOCALIZATION_TO_CHROMOSOME_CENTROMERIC_REGION	Details ...	22	0.782713	2.14822	0	0.000124366	0.005	1834	tags=59%, list=9%, signal=65%
GO_TELOMERE_MAINTENANCE_VIA_SEMI_CONSERVATIVE_REPLICATION	GO_TELOMERE_MAINTENANCE_VIA_SEMI_CONSERVATIVE_REPLICATION	Details ...	28	0.739057	2.1497	0	0.000127555	0.005	2241	tags=68%, list=12%, signal=77%
GO_MITOTIC_SPINDLE_ORGANIZATION	GO_MITOTIC_SPINDLE_ORGANIZATION	Details ...	102	0.573303	2.12818	0	0.0001421	0.006	506	tags=25%, list=3%, signal=26%
GO_FEMALE_MEIOTIC_NUCLEAR_DIVISION	GO_FEMALE_MEIOTIC_NUCLEAR_DIVISION	Details ...	29	0.736605	2.13001	0	0.000145566	0.006	869	tags=38%, list=4%, signal=40%
GO_DNA_REPLICATION_DEPENDENT_NUCLEOSOME_ORGANIZATION	GO_DNA_REPLICATION_DEPENDENT_NUCLEOSOME_ORGANIZATION	Details ...	30	0.724277	2.12106	0	0.000161717	0.007	3359	tags=47%, list=17%, signal=56%
GO_RECOMBINATIONAL_REPAIR	GO_RECOMBINATIONAL_REPAIR	Details ...	126	0.552606	2.11733	0	0.000202435	0.009	4726	tags=52%, list=24%, signal=69%
GO_CELL_CYCLE_G2_M_PHASE_TRANSITION	GO_CELL_CYCLE_G2_M_PHASE_TRANSITION	Details ...	265	0.5035	2.10602	0	0.00032198	0.015	2233	tags=29%, list=12%, signal=32%
GO_PROTEIN_LOCALIZATION_TO_KINETOCHORE	GO_PROTEIN_LOCALIZATION_TO_KINETOCHORE	Details ...	17	0.815787	2.10986	0	0.000329135	0.015	1834	tags=65%, list=9%, signal=71%
GO_NEGATIVE_REGULATION_OF_CHROMOSOME_ORGANIZATION	GO_NEGATIVE_REGULATION_OF_CHROMOSOME_ORGANIZATION	Details ...	140	0.539054	2.1021	0	0.000336617	0.017	2224	tags=26%, list=11%, signal=30%
GO_NEGATIVE_REGULATION_OF_NUCLEAR_DIVISION	GO_NEGATIVE_REGULATION_OF_NUCLEAR_DIVISION	Details ...	59	0.617623	2.10321	0	0.000343487	0.017	1923	tags=41%, list=10%, signal=45%
GO_SPINDLE_ORGANIZATION	GO_SPINDLE_ORGANIZATION	Details ...	166	0.533061	2.10418	0	0.000350643	0.017	3261	tags=39%, list=17%, signal=46%
GO_CHROMOSOME_ORGANIZATION_INVOLVED_IN_MEIOTIC_CELL_CYCLE	GO_CHROMOSOME_ORGANIZATION_INVOLVED_IN_MEIOTIC_CELL_CYCLE	Details ...	64	0.61049	2.10564	0	0.000358104	0.017	3385	tags=39%, list=17%, signal=47%
GO_MICROTUBULE_ORGANIZING_CENTER_ORGANIZATION	GO_MICROTUBULE_ORGANIZING_CENTER_ORGANIZATION	Details ...	133	0.540786	2.09487	0	0.000388008	0.02	3249	tags=36%, list=17%, signal=43%
GO_REGULATION_OF_CELL_CYCLE_G2_M_PHASE_TRANSITION	GO_REGULATION_OF_CELL_CYCLE_G2_M_PHASE_TRANSITION	Details ...	211	0.510763	2.08846	0	0.000399531	0.021	4981	tags=50%, list=26%, signal=66%
GO_DNA_REPLICATION_CHECKPOINT	GO_DNA_REPLICATION_CHECKPOINT	Details ...	16	0.824816	2.08403	0	0.000429507	0.023	2238	tags=63%, list=12%, signal=71%
GO_SISTER_CHROMATID_COHESION	GO_SISTER_CHROMATID_COHESION	Details ...	56	0.613383	2.0691	0	0.000533372	0.029	3056	tags=41%, list=16%, signal=49%
GO_PROTEIN_DNA_COMPLEX_SUBUNIT_ORGANIZATION	GO_PROTEIN_DNA_COMPLEX_SUBUNIT_ORGANIZATION	Details ...	273	0.488287	2.05954	0	0.000585871	0.033	3823	tags=34%, list=20%, signal=42%
GO_REGULATION_OF_UBIQUITIN_PROTEIN_LIGASE_ACTIVITY	GO_REGULATION_OF_UBIQUITIN_PROTEIN_LIGASE_ACTIVITY	Details ...	21	0.759102	2.05776	0	0.000592903	0.034	1088	tags=43%, list=6%, signal=45%
GO_REGULATION_OF_DNA_DEPENDENT_DNA_REPLICATION	GO_REGULATION_OF_DNA_DEPENDENT_DNA_REPLICATION	Details ...	51	0.631086	2.06024	0	0.000596523	0.033	3755	tags=59%, list=19%, signal=73%
GO_REGULATION_OF_NUCLEAR_DIVISION	GO_REGULATION_OF_NUCLEAR_DIVISION	Details ...	206	0.498518	2.05473	0	0.000634437	0.036	2560	tags=33%, list=13%, signal=38%
GO_ANTIMICROBIAL_HUMORAL_RESPONSE	GO_ANTIMICROBIAL_HUMORAL_RESPONSE	Details ...	117	0.538893	2.03971	0	0.000700967	0.042	2450	tags=32%, list=13%, signal=36%
GO_ATP_DEPENDENT_CHROMATIN_REMODELING	GO_ATP_DEPENDENT_CHROMATIN_REMODELING	Details ...	81	0.575578	2.04411	0	0.000707779	0.041	3231	tags=37%, list=17%, signal=44%
GO_MITOTIC_CYTOKINESIS	GO_MITOTIC_CYTOKINESIS	Details ...	69	0.59459	2.04268	0	0.00071265	0.042	1650	tags=30%, list=9%, signal=33%
GO_INTERSTRAND_CROSS_LINK_REPAIR	GO_INTERSTRAND_CROSS_LINK_REPAIR	Details ...	53	0.618054	2.03311	0	0.000754002	0.046	3518	tags=45%, list=18%, signal=55%
GO_REGULATION_OF_DNA_REPLICATION	GO_REGULATION_OF_DNA_REPLICATION	Details ...	106	0.542982	2.02718	0	0.000853992	0.053	2814	tags=40%, list=15%, signal=46%
GO_MITOTIC_METAPHASE_PLATE_CONGRESSION	GO_MITOTIC_METAPHASE_PLATE_CONGRESSION	Details ...	44	0.633198	2.0284	0	0.000867547	0.053	1686	tags=34%, list=9%, signal=37%
GO_REGULATION_OF_TRANSCRIPTION_INVOLVED_IN_G1_S_TRANSITION_OF_MITOTIC_CELL_CYCLE	GO_REGULATION_OF_TRANSCRIPTION_INVOLVED_IN_G1_S_TRANSITION_OF_MITOTIC_CELL_CYCLE	Details ...	28	0.695099	2.02283	0	0.000870688	0.054	3739	tags=75%, list=19%, signal=93%
GO_DNA_STRAND_ELONGATION	GO_DNA_STRAND_ELONGATION	Details ...	21	0.737489	2.01523	0	0.00110037	0.07	3218	tags=71%, list=17%, signal=86%
GO_DNA_RECOMBINATION	GO_DNA_RECOMBINATION	Details ...	278	0.477509	2.00914	0	0.00118758	0.077	4726	tags=45%, list=24%, signal=59%
GO_CENTROSOME_DUPLICATION	GO_CENTROSOME_DUPLICATION	Details ...	67	0.56896	2.00566	0	0.00128648	0.085	4981	tags=54%, list=26%, signal=72%
GO_PROTEIN_LOCALIZATION_TO_CHROMOSOME	GO_PROTEIN_LOCALIZATION_TO_CHROMOSOME	Details ...	83	0.562996	1.99766	0	0.00149838	0.097	2197	tags=33%, list=11%, signal=37%
GO_STRESS_RESPONSE_TO_METAL_ION	GO_STRESS_RESPONSE_TO_METAL_ION	Details ...	16	0.780384	1.99495	0	0.00154846	0.102	1998	tags=56%, list=10%, signal=63%
GO_DNA_DAMAGE_RESPONSE_DETECTION_OF_DNA_DAMAGE	GO_DNA_DAMAGE_RESPONSE_DETECTION_OF_DNA_DAMAGE	Details ...	39	0.62621	1.99071	0	0.00159612	0.107	2143	tags=38%, list=11%, signal=43%
GO_MONOCYTE_CHEMOTAXIS	GO_MONOCYTE_CHEMOTAXIS	Details ...	63	0.581915	1.98493	0	0.00163019	0.113	2513	tags=44%, list=13%, signal=51%
GO_ANAPHASE_PROMOTING_COMPLEX_DEPENDENT_CATABOLIC_PROCESS	GO_ANAPHASE_PROMOTING_COMPLEX_DEPENDENT_CATABOLIC_PROCESS	Details ...	81	0.554002	1.98637	0	0.00163895	0.112	5278	tags=56%, list=27%, signal=76%
GO_CELL_CYCLE_CHECKPOINT	GO_CELL_CYCLE_CHECKPOINT	Details ...	214	0.483424	1.98865	0	0.00164262	0.111	1948	tags=28%, list=10%, signal=31%
GO_NEUTROPHIL_MIGRATION	GO_NEUTROPHIL_MIGRATION	Details ...	111	0.527426	1.98665	0	0.00164773	0.112	2540	tags=39%, list=13%, signal=44%
GO_KINETOCHORE_ASSEMBLY	GO_KINETOCHORE_ASSEMBLY	Details ...	16	0.784361	1.98176	0	0.00168629	0.118	1197	tags=44%, list=6%, signal=47%
GO_POSITIVE_REGULATION_OF_CELL_CYCLE_PHASE_TRANSITION	GO_POSITIVE_REGULATION_OF_CELL_CYCLE_PHASE_TRANSITION	Details ...	93	0.540475	1.97358	0	0.00183176	0.13	1746	tags=32%, list=9%, signal=35%
GO_ZINC_ION_HOMEOSTASIS	GO_ZINC_ION_HOMEOSTASIS	Details ...	37	0.64465	1.97095	0	0.00187162	0.133	2910	tags=46%, list=15%, signal=54%
GO_POSITIVE_REGULATION_OF_CELL_CYCLE_G2_M_PHASE_TRANSITION	GO_POSITIVE_REGULATION_OF_CELL_CYCLE_G2_M_PHASE_TRANSITION	Details ...	31	0.644013	1.9698	0	0.00189845	0.137	1011	tags=39%, list=5%, signal=41%
GO_SPINDLE_ASSEMBLY	GO_SPINDLE_ASSEMBLY	Details ...	105	0.523869	1.96621	0	0.00204833	0.149	3261	tags=38%, list=17%, signal=46%
GO_REGULATION_OF_DOUBLE_STRAND_BREAK_REPAIR	GO_REGULATION_OF_DOUBLE_STRAND_BREAK_REPAIR	Details ...	74	0.551327	1.95739	0	0.00237941	0.173	1677	tags=32%, list=9%, signal=35%
GO_REGULATION_OF_CELL_CYCLE_PHASE_TRANSITION	GO_REGULATION_OF_CELL_CYCLE_PHASE_TRANSITION	Details ...	435	0.443	1.95193	0	0.00255605	0.188	2233	tags=25%, list=12%, signal=28%
GO_MITOTIC_G2_M_TRANSITION_CHECKPOINT	GO_MITOTIC_G2_M_TRANSITION_CHECKPOINT	Details ...	30	0.668252	1.94489	0	0.00283719	0.207	1247	tags=37%, list=6%, signal=39%
GO_MITOTIC_CELL_CYCLE_CHECKPOINT	GO_MITOTIC_CELL_CYCLE_CHECKPOINT	Details ...	163	0.491314	1.94534	0	0.00285959	0.207	1810	tags=29%, list=9%, signal=32%
GO_CYTOSKELETON_DEPENDENT_CYTOKINESIS	GO_CYTOSKELETON_DEPENDENT_CYTOKINESIS	Details ...	96	0.524234	1.94393	0	0.00287335	0.212	1650	tags=25%, list=9%, signal=27%
GO_CELL_CYCLE_G1_S_PHASE_TRANSITION	GO_CELL_CYCLE_G1_S_PHASE_TRANSITION	Details ...	252	0.463211	1.94125	0	0.00296728	0.221	2487	tags=32%, list=13%, signal=36%
GO_G2_DNA_DAMAGE_CHECKPOINT	GO_G2_DNA_DAMAGE_CHECKPOINT	Details ...	31	0.656668	1.9318	0	0.00334081	0.247	1432	tags=35%, list=7%, signal=38%
GO_REGULATION_OF_CELL_AGING	GO_REGULATION_OF_CELL_AGING	Details ...	45	0.592311	1.92658	0	0.00353972	0.26	1552	tags=27%, list=8%, signal=29%
GO_NEGATIVE_REGULATION_OF_CELL_CYCLE_G2_M_PHASE_TRANSITION	GO_NEGATIVE_REGULATION_OF_CELL_CYCLE_G2_M_PHASE_TRANSITION	Details ...	101	0.519905	1.92102	0	0.00380107	0.283	5267	tags=51%, list=27%, signal=70%
GO_DNA_DEPENDENT_DNA_REPLICATION_MAINTENANCE_OF_FIDELITY	GO_DNA_DEPENDENT_DNA_REPLICATION_MAINTENANCE_OF_FIDELITY	Details ...	42	0.605972	1.91907	0	0.00385795	0.289	3231	tags=52%, list=17%, signal=63%
GO_POSITIVE_REGULATION_OF_MITOTIC_CELL_CYCLE	GO_POSITIVE_REGULATION_OF_MITOTIC_CELL_CYCLE	Details ...	151	0.483253	1.91727	0	0.00391445	0.294	1746	tags=28%, list=9%, signal=31%
GO_CHROMOSOME_CONDENSATION	GO_CHROMOSOME_CONDENSATION	Details ...	42	0.613972	1.91397	0	0.00403213	0.305	970	tags=31%, list=5%, signal=33%
GO_NEGATIVE_REGULATION_OF_GENE_EXPRESSION_EPIGENETIC	GO_NEGATIVE_REGULATION_OF_GENE_EXPRESSION_EPIGENETIC	Details ...	126	0.502012	1.91139	0	0.00417109	0.316	4738	tags=33%, list=24%, signal=44%
GO_ESTABLISHMENT_OF_MITOTIC_SPINDLE_LOCALIZATION	GO_ESTABLISHMENT_OF_MITOTIC_SPINDLE_LOCALIZATION	Details ...	27	0.659239	1.90371	0	0.00471982	0.351	1829	tags=41%, list=9%, signal=45%
GO_CENTRIOLE_ASSEMBLY	GO_CENTRIOLE_ASSEMBLY	Details ...	40	0.596432	1.89272	0	0.00542018	0.403	2820	tags=40%, list=15%, signal=47%
GO_MITOTIC_SPINDLE_ASSEMBLY	GO_MITOTIC_SPINDLE_ASSEMBLY	Details ...	53	0.57204	1.89156	0	0.00543612	0.405	3897	tags=49%, list=20%, signal=61%
GO_NEGATIVE_REGULATION_OF_CELL_AGING	GO_NEGATIVE_REGULATION_OF_CELL_AGING	Details ...	24	0.680265	1.89289	0	0.00545588	0.403	1552	tags=38%, list=8%, signal=41%
GO_REGULATION_OF_MONOCYTE_CHEMOTAXIS	GO_REGULATION_OF_MONOCYTE_CHEMOTAXIS	Details ...	25	0.664079	1.88311	0	0.00615187	0.455	1256	tags=40%, list=6%, signal=43%
GO_NEGATIVE_REGULATION_OF_CELLULAR_SENESCENCE	GO_NEGATIVE_REGULATION_OF_CELLULAR_SENESCENCE	Details ...	18	0.714852	1.88173	0	0.00620021	0.459	1552	tags=44%, list=8%, signal=48%
GO_GRANULOCYTE_MIGRATION	GO_GRANULOCYTE_MIGRATION	Details ...	133	0.496427	1.87983	0	0.00631731	0.472	2708	tags=38%, list=14%, signal=43%
GO_REGULATION_OF_CYCLIN_DEPENDENT_PROTEIN_KINASE_ACTIVITY	GO_REGULATION_OF_CYCLIN_DEPENDENT_PROTEIN_KINASE_ACTIVITY	Details ...	100	0.50587	1.8724	0	0.00706141	0.509	1746	tags=30%, list=9%, signal=33%
GO_HOMOLOGOUS_CHROMOSOME_SEGREGATION	GO_HOMOLOGOUS_CHROMOSOME_SEGREGATION	Details ...	55	0.565765	1.86658	0	0.00771612	0.553	3385	tags=35%, list=17%, signal=42%
GO_CELLULAR_RESPONSE_TO_CADMIUM_ION	GO_CELLULAR_RESPONSE_TO_CADMIUM_ION	Details ...	36	0.600703	1.86446	0	0.00782503	0.556	1927	tags=36%, list=10%, signal=40%
GO_HUMORAL_IMMUNE_RESPONSE	GO_HUMORAL_IMMUNE_RESPONSE	Details ...	246	0.448674	1.86026	0	0.00815726	0.573	2531	tags=28%, list=13%, signal=31%
GO_MITOTIC_CHROMOSOME_CONDENSATION	GO_MITOTIC_CHROMOSOME_CONDENSATION	Details ...	17	0.705532	1.85964	0	0.00817332	0.576	1502	tags=47%, list=8%, signal=51%
GO_SPINDLE_LOCALIZATION	GO_SPINDLE_LOCALIZATION	Details ...	42	0.582916	1.85856	0.00454545	0.00819927	0.582	1829	tags=31%, list=9%, signal=34%
GO_REGULATION_OF_DOUBLE_STRAND_BREAK_REPAIR_VIA_HOMOLOGOUS_RECOMBINATION	GO_REGULATION_OF_DOUBLE_STRAND_BREAK_REPAIR_VIA_HOMOLOGOUS_RECOMBINATION	Details ...	44	0.567052	1.86027	0.00203252	0.0082357	0.573	1584	tags=32%, list=8%, signal=35%
GO_POSITIVE_REGULATION_OF_ADAPTIVE_IMMUNE_RESPONSE	GO_POSITIVE_REGULATION_OF_ADAPTIVE_IMMUNE_RESPONSE		97	0.448543	1.66359	0	0.00823913	1	4127	tags=43%, list=21%, signal=55%
GO_MALE_MEIOTIC_NUCLEAR_DIVISION	GO_MALE_MEIOTIC_NUCLEAR_DIVISION	Details ...	46	0.573815	1.85567	0	0.00858273	0.599	2886	tags=33%, list=15%, signal=38%
GO_REGULATION_OF_IMMUNE_EFFECTOR_PROCESS	GO_REGULATION_OF_IMMUNE_EFFECTOR_PROCESS		382	0.376162	1.63263	0	0.00911943	1	3496	tags=32%, list=18%, signal=39%
GO_CHROMATIN_ORGANIZATION_INVOLVED_IN_REGULATION_OF_TRANSCRIPTION	GO_CHROMATIN_ORGANIZATION_INVOLVED_IN_REGULATION_OF_TRANSCRIPTION	Details ...	118	0.486245	1.84868	0	0.00937112	0.636	4738	tags=31%, list=24%, signal=41%
GO_REGULATION_OF_INNATE_IMMUNE_RESPONSE	GO_REGULATION_OF_INNATE_IMMUNE_RESPONSE		428	0.370714	1.62391	0	0.00940316	1	4479	tags=37%, list=23%, signal=48%
GO_ASTROCYTE_ACTIVATION	GO_ASTROCYTE_ACTIVATION	Details ...	20	0.668027	1.84602	0.00198807	0.0097568	0.657	1371	tags=40%, list=7%, signal=43%
GO_RESPONSE_TO_TYPE_I_INTERFERON	GO_RESPONSE_TO_TYPE_I_INTERFERON	Details ...	87	0.506907	1.84519	0	0.00983093	0.663	3330	tags=31%, list=17%, signal=37%
GO_TELOMERE_ORGANIZATION	GO_TELOMERE_ORGANIZATION	Details ...	170	0.463372	1.8363	0	0.0109158	0.714	4726	tags=44%, list=24%, signal=57%
GO_OOCYTE_MATURATION	GO_OOCYTE_MATURATION	Details ...	25	0.648075	1.83456	0	0.0110752	0.724	1080	tags=28%, list=6%, signal=30%
GO_REGULATION_OF_CYTOKINESIS	GO_REGULATION_OF_CYTOKINESIS	Details ...	88	0.506121	1.82873	0	0.0112085	0.749	2149	tags=23%, list=11%, signal=25%
GO_REGULATION_OF_CENTROSOME_CYCLE	GO_REGULATION_OF_CENTROSOME_CYCLE	Details ...	58	0.539916	1.83002	0	0.0112295	0.744	3179	tags=34%, list=16%, signal=41%
GO_CELLULAR_RESPONSE_TO_BIOTIC_STIMULUS	GO_CELLULAR_RESPONSE_TO_BIOTIC_STIMULUS	Details ...	226	0.444479	1.82952	0	0.0112362	0.746	3203	tags=33%, list=17%, signal=39%
GO_CYTOKINESIS	GO_CYTOKINESIS	Details ...	167	0.45933	1.83033	0	0.0112997	0.744	1084	tags=17%, list=6%, signal=18%
GO_CHROMATIN_SILENCING_AT_RDNA	GO_CHROMATIN_SILENCING_AT_RDNA	Details ...	38	0.584981	1.83282	0	0.0113006	0.732	3359	tags=29%, list=17%, signal=35%
GO_POSITIVE_REGULATION_OF_DNA_REPLICATION	GO_POSITIVE_REGULATION_OF_DNA_REPLICATION	Details ...	37	0.585508	1.83066	0.00401606	0.0113632	0.742	2738	tags=43%, list=14%, signal=50%
GO_POSITIVE_REGULATION_OF_CELL_CYCLE_PROCESS	GO_POSITIVE_REGULATION_OF_CELL_CYCLE_PROCESS	Details ...	279	0.435234	1.83089	0	0.011401	0.739	1948	tags=24%, list=10%, signal=27%
GO_ADAPTIVE_IMMUNE_RESPONSE	GO_ADAPTIVE_IMMUNE_RESPONSE		385	0.368397	1.60442	0	0.0114939	1	4454	tags=39%, list=23%, signal=50%
GO_T_CELL_CHEMOTAXIS	GO_T_CELL_CHEMOTAXIS	Details ...	27	0.628366	1.8167	0.00414938	0.0131267	0.802	2041	tags=41%, list=11%, signal=45%
GO_POSITIVE_REGULATION_OF_CYTOKINESIS	GO_POSITIVE_REGULATION_OF_CYTOKINESIS	Details ...	39	0.570313	1.81716	0	0.013137	0.799	1084	tags=21%, list=6%, signal=22%
GO_CENTROSOME_SEPARATION	GO_CENTROSOME_SEPARATION	Details ...	15	0.725351	1.81526	0.00221239	0.0131813	0.803	1829	tags=47%, list=9%, signal=51%
GO_NUCLEOBASE_BIOSYNTHETIC_PROCESS	GO_NUCLEOBASE_BIOSYNTHETIC_PROCESS	Details ...	19	0.681462	1.81438	0.00200803	0.0132914	0.806	3024	tags=63%, list=16%, signal=75%
GO_NEGATIVE_REGULATION_OF_CELL_CYCLE_PHASE_TRANSITION	GO_NEGATIVE_REGULATION_OF_CELL_CYCLE_PHASE_TRANSITION	Details ...	235	0.436581	1.80729	0	0.0144458	0.837	2149	tags=25%, list=11%, signal=27%
GO_TOLERANCE_INDUCTION	GO_TOLERANCE_INDUCTION	Details ...	24	0.634896	1.80631	0	0.014528	0.838	1469	tags=42%, list=8%, signal=45%
GO_POSTREPLICATION_REPAIR	GO_POSTREPLICATION_REPAIR	Details ...	51	0.549014	1.80749	0.00213675	0.0145297	0.836	2143	tags=39%, list=11%, signal=44%
GO_REGULATION_OF_DNA_METHYLATION	GO_REGULATION_OF_DNA_METHYLATION	Details ...	23	0.648026	1.80212	0.00218818	0.014887	0.857	5358	tags=52%, list=28%, signal=72%
GO_POSITIVE_REGULATION_OF_IMMUNE_EFFECTOR_PROCESS	GO_POSITIVE_REGULATION_OF_IMMUNE_EFFECTOR_PROCESS		203	0.384518	1.57936	0	0.014924	1	3140	tags=30%, list=16%, signal=35%
GO_DNA_SYNTHESIS_INVOLVED_IN_DNA_REPAIR	GO_DNA_SYNTHESIS_INVOLVED_IN_DNA_REPAIR	Details ...	52	0.545381	1.80279	0.00203252	0.0149712	0.854	2241	tags=38%, list=12%, signal=43%
GO_DEFENSE_RESPONSE_TO_OTHER_ORGANISM	GO_DEFENSE_RESPONSE_TO_OTHER_ORGANISM	Details ...	484	0.402958	1.80223	0	0.0149932	0.857	3616	tags=28%, list=19%, signal=34%
GO_NEGATIVE_REGULATION_OF_DNA_REPAIR	GO_NEGATIVE_REGULATION_OF_DNA_REPAIR	Details ...	33	0.594559	1.80315	0.00205339	0.0150025	0.853	1677	tags=33%, list=9%, signal=36%
GO_RESPONSE_TO_COPPER_ION	GO_RESPONSE_TO_COPPER_ION	Details ...	42	0.571553	1.80324	0	0.0151123	0.853	2910	tags=36%, list=15%, signal=42%
GO_REGULATION_OF_DNA_REPAIR	GO_REGULATION_OF_DNA_REPAIR	Details ...	118	0.474022	1.79911	0	0.0153268	0.869	1698	tags=27%, list=9%, signal=30%
GO_LYMPHOCYTE_ACTIVATION_INVOLVED_IN_IMMUNE_RESPONSE	GO_LYMPHOCYTE_ACTIVATION_INVOLVED_IN_IMMUNE_RESPONSE		172	0.365679	1.47779	0	0.0157255	1	3815	tags=35%, list=20%, signal=43%
GO_INTERLEUKIN_2_PRODUCTION	GO_INTERLEUKIN_2_PRODUCTION	Details ...	63	0.521666	1.7876	0	0.0176358	0.908	4095	tags=57%, list=21%, signal=72%
GO_REGULATORY_T_CELL_DIFFERENTIATION	GO_REGULATORY_T_CELL_DIFFERENTIATION	Details ...	29	0.608202	1.78455	0.00208768	0.0182336	0.915	2118	tags=45%, list=11%, signal=50%
GO_CILIARY_BASAL_BODY_PLASMA_MEMBRANE_DOCKING	GO_CILIARY_BASAL_BODY_PLASMA_MEMBRANE_DOCKING	Details ...	95	0.491458	1.78267	0	0.0185534	0.921	4981	tags=49%, list=26%, signal=66%
GO_NON_RECOMBINATIONAL_REPAIR	GO_NON_RECOMBINATIONAL_REPAIR	Details ...	96	0.490048	1.78169	0	0.01873	0.924	4633	tags=43%, list=24%, signal=56%
GO_CORTICAL_CYTOSKELETON_ORGANIZATION	GO_CORTICAL_CYTOSKELETON_ORGANIZATION	Details ...	45	0.54833	1.78105	0	0.0187312	0.926	3709	tags=42%, list=19%, signal=52%
GO_MONONUCLEAR_CELL_MIGRATION	GO_MONONUCLEAR_CELL_MIGRATION	Details ...	86	0.490724	1.77974	0	0.0188827	0.929	2513	tags=40%, list=13%, signal=45%
GO_DEFENSE_RESPONSE_TO_VIRUS	GO_DEFENSE_RESPONSE_TO_VIRUS	Details ...	236	0.428451	1.77797	0	0.0189598	0.932	3140	tags=27%, list=16%, signal=32%
GO_NEGATIVE_REGULATION_OF_DNA_REPLICATION	GO_NEGATIVE_REGULATION_OF_DNA_REPLICATION	Details ...	39	0.571151	1.77855	0.00406504	0.0190104	0.932	2814	tags=41%, list=15%, signal=48%
GO_CHROMATIN_REMODELING	GO_CHROMATIN_REMODELING	Details ...	169	0.446104	1.77623	0	0.0192177	0.937	3271	tags=30%, list=17%, signal=35%
GO_REGULATION_OF_ADAPTIVE_IMMUNE_RESPONSE	GO_REGULATION_OF_ADAPTIVE_IMMUNE_RESPONSE		153	0.35098	1.38219	0.00215983	0.0207379	1	4127	tags=38%, list=21%, signal=48%
GO_NEGATIVE_REGULATION_OF_IMMUNE_SYSTEM_PROCESS	GO_NEGATIVE_REGULATION_OF_IMMUNE_SYSTEM_PROCESS		434	0.309155	1.36173	0	0.022663	1	2531	tags=24%, list=13%, signal=27%
GO_SERINE_FAMILY_AMINO_ACID_BIOSYNTHETIC_PROCESS	GO_SERINE_FAMILY_AMINO_ACID_BIOSYNTHETIC_PROCESS	Details ...	20	0.66463	1.76109	0.00647948	0.0228874	0.967	2616	tags=45%, list=14%, signal=52%
GO_RETROGRADE_VESICLE_MEDIATED_TRANSPORT_GOLGI_TO_ENDOPLASMIC_RETICULUM	GO_RETROGRADE_VESICLE_MEDIATED_TRANSPORT_GOLGI_TO_ENDOPLASMIC_RETICULUM	Details ...	85	0.489349	1.75749	0	0.023762	0.971	4043	tags=29%, list=21%, signal=37%
GO_REGULATION_OF_EXTRACELLULAR_MATRIX_DISASSEMBLY	GO_REGULATION_OF_EXTRACELLULAR_MATRIX_DISASSEMBLY	Details ...	16	0.685115	1.75677	0.00558659	0.0237901	0.972	1275	tags=38%, list=7%, signal=40%
GO_POSITIVE_REGULATION_OF_MONOCYTE_CHEMOTAXIS	GO_POSITIVE_REGULATION_OF_MONOCYTE_CHEMOTAXIS	Details ...	18	0.673161	1.7534	0.00208768	0.0244179	0.976	1243	tags=39%, list=6%, signal=42%
GO_DNA_GEOMETRIC_CHANGE	GO_DNA_GEOMETRIC_CHANGE	Details ...	93	0.471677	1.75348	0	0.024558	0.976	5091	tags=46%, list=26%, signal=62%
GO_SYNAPSIS	GO_SYNAPSIS	Details ...	46	0.534749	1.75014	0.0021097	0.0251051	0.978	3385	tags=33%, list=17%, signal=39%
GO_SUBSTRATE_DEPENDENT_CELL_MIGRATION	GO_SUBSTRATE_DEPENDENT_CELL_MIGRATION	Details ...	29	0.604556	1.75068	0.0020202	0.0251067	0.978	4398	tags=59%, list=23%, signal=76%
GO_CELL_CELL_ADHESION_MEDIATED_BY_INTEGRIN	GO_CELL_CELL_ADHESION_MEDIATED_BY_INTEGRIN	Details ...	16	0.690915	1.74925	0	0.0252951	0.978	2008	tags=38%, list=10%, signal=42%
GO_EOSINOPHIL_CHEMOTAXIS	GO_EOSINOPHIL_CHEMOTAXIS	Details ...	20	0.640709	1.74766	0.00422833	0.0256626	0.983	3185	tags=55%, list=16%, signal=66%
GO_REGULATION_OF_HISTONE_H3_K9_METHYLATION	GO_REGULATION_OF_HISTONE_H3_K9_METHYLATION	Details ...	23	0.634199	1.7421	0.00392927	0.0267261	0.987	1649	tags=26%, list=9%, signal=28%
GO_NEGATIVE_REGULATION_OF_MITOTIC_CELL_CYCLE	GO_NEGATIVE_REGULATION_OF_MITOTIC_CELL_CYCLE	Details ...	305	0.407216	1.74227	0	0.026829	0.987	2149	tags=24%, list=11%, signal=26%
GO_CORNIFICATION	GO_CORNIFICATION	Details ...	112	0.464157	1.73814	0	0.0269103	0.989	2230	tags=29%, list=12%, signal=32%
GO_ANTIGEN_PROCESSING_AND_PRESENTATION_OF_PEPTIDE_OR_POLYSACCHARIDE_ANTIGEN_VIA_MHC_CLASS_II	GO_ANTIGEN_PROCESSING_AND_PRESENTATION_OF_PEPTIDE_OR_POLYSACCHARIDE_ANTIGEN_VIA_MHC_CLASS_II	Details ...	86	0.48287	1.74242	0	0.0269665	0.987	3285	tags=30%, list=17%, signal=36%
GO_NUCLEOSIDE_SALVAGE	GO_NUCLEOSIDE_SALVAGE	Details ...	16	0.684006	1.73838	0.00860215	0.0269796	0.988	3837	tags=63%, list=20%, signal=78%
GO_CELLULAR_RESPONSE_TO_ZINC_ION	GO_CELLULAR_RESPONSE_TO_ZINC_ION	Details ...	22	0.646637	1.73839	0.00200803	0.0271441	0.988	913	tags=32%, list=5%, signal=33%
GO_POSITIVE_REGULATION_OF_INTERLEUKIN_6_SECRETION	GO_POSITIVE_REGULATION_OF_INTERLEUKIN_6_SECRETION	Details ...	27	0.592216	1.73848	0.00209205	0.0272856	0.988	1243	tags=33%, list=6%, signal=36%
GO_REGULATION_OF_DNA_RECOMBINATION	GO_REGULATION_OF_DNA_RECOMBINATION	Details ...	100	0.468054	1.73915	0	0.0272954	0.988	4827	tags=49%, list=25%, signal=65%
GO_RESPONSE_TO_CHEMOKINE	GO_RESPONSE_TO_CHEMOKINE	Details ...	94	0.476107	1.73948	0	0.027317	0.988	2513	tags=38%, list=13%, signal=44%
GO_CYTOKINETIC_PROCESS	GO_CYTOKINETIC_PROCESS	Details ...	38	0.563477	1.73639	0.0040404	0.0273217	0.99	1084	tags=24%, list=6%, signal=25%
GO_NEGATIVE_REGULATION_OF_DNA_DEPENDENT_DNA_REPLICATION	GO_NEGATIVE_REGULATION_OF_DNA_DEPENDENT_DNA_REPLICATION	Details ...	25	0.618221	1.73392	0.00389105	0.0279403	0.991	4073	tags=64%, list=21%, signal=81%
GO_NEGATIVE_REGULATION_OF_CHROMATIN_ORGANIZATION	GO_NEGATIVE_REGULATION_OF_CHROMATIN_ORGANIZATION	Details ...	60	0.507181	1.7318	0	0.0284457	0.991	4711	tags=37%, list=24%, signal=48%
GO_POSITIVE_REGULATION_OF_LEUKOCYTE_APOPTOTIC_PROCESS	GO_POSITIVE_REGULATION_OF_LEUKOCYTE_APOPTOTIC_PROCESS	Details ...	28	0.590593	1.72598	0.00792079	0.0303391	0.994	1454	tags=29%, list=8%, signal=31%
GO_REGULATION_OF_DNA_METABOLIC_PROCESS	GO_REGULATION_OF_DNA_METABOLIC_PROCESS	Details ...	281	0.405599	1.72387	0	0.0304608	0.995	4827	tags=42%, list=25%, signal=55%
GO_ANTIGEN_PROCESSING_AND_PRESENTATION_OF_EXOGENOUS_PEPTIDE_ANTIGEN_VIA_MHC_CLASS_I	GO_ANTIGEN_PROCESSING_AND_PRESENTATION_OF_EXOGENOUS_PEPTIDE_ANTIGEN_VIA_MHC_CLASS_I	Details ...	72	0.497481	1.72459	0	0.0305839	0.995	5876	tags=63%, list=30%, signal=89%
GO_REGULATION_OF_UBIQUITIN_PROTEIN_TRANSFERASE_ACTIVITY	GO_REGULATION_OF_UBIQUITIN_PROTEIN_TRANSFERASE_ACTIVITY	Details ...	51	0.514186	1.72392	0.00630252	0.0306263	0.995	1088	tags=22%, list=6%, signal=23%
GO_POSITIVE_REGULATION_OF_NEURON_APOPTOTIC_PROCESS	GO_POSITIVE_REGULATION_OF_NEURON_APOPTOTIC_PROCESS	Details ...	52	0.522724	1.72126	0.00406504	0.0311124	0.995	2217	tags=23%, list=11%, signal=26%
GO_POSITIVE_REGULATION_OF_MITOTIC_NUCLEAR_DIVISION	GO_POSITIVE_REGULATION_OF_MITOTIC_NUCLEAR_DIVISION	Details ...	54	0.51315	1.71275	0	0.0340804	0.997	2560	tags=31%, list=13%, signal=36%
GO_NEGATIVE_REGULATION_OF_HISTONE_MODIFICATION	GO_NEGATIVE_REGULATION_OF_HISTONE_MODIFICATION	Details ...	41	0.54855	1.71107	0.00209644	0.0344894	0.997	2608	tags=27%, list=13%, signal=31%
GO_REGULATION_OF_CHROMOSOME_ORGANIZATION	GO_REGULATION_OF_CHROMOSOME_ORGANIZATION	Details ...	330	0.399865	1.70747	0	0.0348335	0.998	2224	tags=19%, list=11%, signal=21%
GO_GRANULOCYTE_MACROPHAGE_COLONY_STIMULATING_FACTOR_PRODUCTION	GO_GRANULOCYTE_MACROPHAGE_COLONY_STIMULATING_FACTOR_PRODUCTION	Details ...	16	0.649817	1.709	0.00803213	0.0348473	0.997	1124	tags=38%, list=6%, signal=40%
GO_NUCLEOTIDE_EXCISION_REPAIR_DNA_GAP_FILLING	GO_NUCLEOTIDE_EXCISION_REPAIR_DNA_GAP_FILLING	Details ...	23	0.616183	1.7084	0.00835073	0.0348861	0.997	3755	tags=61%, list=19%, signal=75%
GO_NEGATIVE_REGULATION_OF_CELL_CYCLE_PROCESS	GO_NEGATIVE_REGULATION_OF_CELL_CYCLE_PROCESS	Details ...	325	0.398327	1.70778	0	0.0348909	0.998	2521	tags=24%, list=13%, signal=27%
GO_ACTIVATION_OF_INNATE_IMMUNE_RESPONSE	GO_ACTIVATION_OF_INNATE_IMMUNE_RESPONSE		310	0.330911	1.41035	0.00234192	0.0349014	1	4965	tags=40%, list=26%, signal=53%
GO_ANTIGEN_PROCESSING_AND_PRESENTATION_OF_PEPTIDE_ANTIGEN	GO_ANTIGEN_PROCESSING_AND_PRESENTATION_OF_PEPTIDE_ANTIGEN	Details ...	165	0.429866	1.7091	0	0.0350166	0.997	4824	tags=42%, list=25%, signal=55%
GO_CHRONIC_INFLAMMATORY_RESPONSE	GO_CHRONIC_INFLAMMATORY_RESPONSE	Details ...	18	0.659752	1.70288	0.00862069	0.0363002	0.998	1836	tags=50%, list=9%, signal=55%
GO_REGULATION_OF_CELLULAR_AMINO_ACID_METABOLIC_PROCESS	GO_REGULATION_OF_CELLULAR_AMINO_ACID_METABOLIC_PROCESS	Details ...	60	0.496374	1.70176	0.00445434	0.0363569	0.998	5267	tags=60%, list=27%, signal=82%
GO_EOSINOPHIL_MIGRATION	GO_EOSINOPHIL_MIGRATION	Details ...	24	0.603001	1.70178	0.00208333	0.0365623	0.998	3185	tags=50%, list=16%, signal=60%
GO_NUCLEOSIDE_MONOPHOSPHATE_BIOSYNTHETIC_PROCESS	GO_NUCLEOSIDE_MONOPHOSPHATE_BIOSYNTHETIC_PROCESS	Details ...	44	0.53338	1.69952	0.00622407	0.0371204	0.998	3837	tags=43%, list=20%, signal=54%
GO_NEGATIVE_REGULATION_OF_IMMUNE_EFFECTOR_PROCESS	GO_NEGATIVE_REGULATION_OF_IMMUNE_EFFECTOR_PROCESS		115	0.374829	1.43077	0.00434783	0.0374181	1	2942	tags=31%, list=15%, signal=37%
GO_REGULATION_OF_TOLERANCE_INDUCTION	GO_REGULATION_OF_TOLERANCE_INDUCTION	Details ...	16	0.648781	1.69627	0.00403226	0.0383354	0.998	1469	tags=44%, list=8%, signal=47%
GO_PYRIMIDINE_NUCLEOSIDE_BIOSYNTHETIC_PROCESS	GO_PYRIMIDINE_NUCLEOSIDE_BIOSYNTHETIC_PROCESS	Details ...	15	0.677389	1.69417	0.00675676	0.0389818	0.998	3837	tags=60%, list=20%, signal=75%
GO_RESPONSE_TO_INTERFERON_GAMMA	GO_RESPONSE_TO_INTERFERON_GAMMA	Details ...	177	0.423428	1.69138	0	0.039106	0.998	3168	tags=32%, list=16%, signal=37%
GO_ESTABLISHMENT_OF_SPINDLE_ORIENTATION	GO_ESTABLISHMENT_OF_SPINDLE_ORIENTATION	Details ...	29	0.570824	1.69074	0.00409836	0.0391365	0.998	1829	tags=31%, list=9%, signal=34%
GO_MYELOID_LEUKOCYTE_MIGRATION	GO_MYELOID_LEUKOCYTE_MIGRATION	Details ...	197	0.419738	1.6929	0	0.0392049	0.998	2540	tags=32%, list=13%, signal=37%
GO_PROTEIN_LOCALIZATION_TO_CYTOSKELETON	GO_PROTEIN_LOCALIZATION_TO_CYTOSKELETON	Details ...	54	0.504476	1.69164	0.00222222	0.0392158	0.998	1166	tags=19%, list=6%, signal=20%
GO_SMOOTH_MUSCLE_CELL_APOPTOTIC_PROCESS	GO_SMOOTH_MUSCLE_CELL_APOPTOTIC_PROCESS	Details ...	24	0.603218	1.69223	0.00421053	0.0392241	0.998	1712	tags=29%, list=9%, signal=32%
GO_TRNA_TRANSPORT	GO_TRNA_TRANSPORT	Details ...	36	0.553063	1.69014	0.00656455	0.0392525	0.998	6071	tags=64%, list=31%, signal=93%
GO_ANTIGEN_PROCESSING_AND_PRESENTATION	GO_ANTIGEN_PROCESSING_AND_PRESENTATION	Details ...	199	0.413336	1.68847	0	0.0397308	0.999	4824	tags=41%, list=25%, signal=54%
GO_REGULATION_OF_HUMORAL_IMMUNE_RESPONSE	GO_REGULATION_OF_HUMORAL_IMMUNE_RESPONSE		67	0.458136	1.56817	0.00437637	0.04154	1	3488	tags=42%, list=18%, signal=51%
GO_PROTEIN_HETEROTETRAMERIZATION	GO_PROTEIN_HETEROTETRAMERIZATION	Details ...	51	0.507968	1.68348	0	0.0416447	1	3359	tags=33%, list=17%, signal=40%
GO_COLLAGEN_FIBRIL_ORGANIZATION	GO_COLLAGEN_FIBRIL_ORGANIZATION	Details ...	49	0.503687	1.68209	0.00672646	0.0417593	1	3123	tags=49%, list=16%, signal=58%
GO_NEGATIVE_REGULATION_OF_INTERLEUKIN_12_PRODUCTION	GO_NEGATIVE_REGULATION_OF_INTERLEUKIN_12_PRODUCTION	Details ...	16	0.660539	1.68264	0.0118812	0.0418113	1	2942	tags=56%, list=15%, signal=66%
GO_NEGATIVE_REGULATION_OF_HISTONE_ACETYLATION	GO_NEGATIVE_REGULATION_OF_HISTONE_ACETYLATION	Details ...	16	0.673642	1.67948	0.0103093	0.0427104	1	2608	tags=44%, list=13%, signal=51%
GO_POSITIVE_REGULATION_OF_CELL_CYCLE	GO_POSITIVE_REGULATION_OF_CELL_CYCLE	Details ...	382	0.389661	1.67988	0	0.0427514	1	1948	tags=22%, list=10%, signal=24%
GO_SEQUESTERING_OF_METAL_ION	GO_SEQUESTERING_OF_METAL_ION	Details ...	15	0.678046	1.67755	0.00824742	0.0433306	1	2788	tags=47%, list=14%, signal=54%
GO_CELLULAR_RESPONSE_TO_COPPER_ION	GO_CELLULAR_RESPONSE_TO_COPPER_ION	Details ...	28	0.576924	1.67176	0.00406504	0.0449659	1	2216	tags=32%, list=11%, signal=36%
GO_RESPONSE_TO_CADMIUM_ION	GO_RESPONSE_TO_CADMIUM_ION	Details ...	62	0.490704	1.67185	0	0.045143	1	1927	tags=29%, list=10%, signal=32%
GO_KERATINIZATION	GO_KERATINIZATION	Details ...	137	0.433508	1.67227	0	0.0451607	1	1492	tags=21%, list=8%, signal=23%
GO_REPLICATION_FORK_PROCESSING	GO_REPLICATION_FORK_PROCESSING	Details ...	32	0.548965	1.67235	0.00840336	0.0453552	1	3231	tags=47%, list=17%, signal=56%
GO_ENDODERM_FORMATION	GO_ENDODERM_FORMATION	Details ...	50	0.514494	1.6724	0.00453515	0.0455727	1	2282	tags=34%, list=12%, signal=38%
GO_REGULATION_OF_MICROGLIAL_CELL_ACTIVATION	GO_REGULATION_OF_MICROGLIAL_CELL_ACTIVATION	Details ...	20	0.625009	1.6692	0.00829876	0.045973	1	2731	tags=55%, list=14%, signal=64%
GO_TRANSLESION_SYNTHESIS	GO_TRANSLESION_SYNTHESIS		41	0.531479	1.6656	0.00422833	0.0474688	1	2143	tags=39%, list=11%, signal=44%
GO_REGULATION_OF_PRODUCTION_OF_MOLECULAR_MEDIATOR_OF_IMMUNE_RESPONSE	GO_REGULATION_OF_PRODUCTION_OF_MOLECULAR_MEDIATOR_OF_IMMUNE_RESPONSE		138	0.364076	1.41988	0.00696056	0.047703	1	4540	tags=41%, list=23%, signal=54%
GO_ADAPTIVE_IMMUNE_RESPONSE_BASED_ON_SOMATIC_RECOMBINATION_OF_IMMUNE_RECEPTORS_BUILT_FROM_IMMUNOGLOBULIN_SUPERFAMILY_DOMAINS	GO_ADAPTIVE_IMMUNE_RESPONSE_BASED_ON_SOMATIC_RECOMBINATION_OF_IMMUNE_RECEPTORS_BUILT_FROM_IMMUNOGLOBULIN_SUPERFAMILY_DOMAINS		246	0.345065	1.43836	0.00909091	0.0480374	1	3147	tags=30%, list=16%, signal=36%
GO_NEGATIVE_REGULATION_OF_CELL_KILLING	GO_NEGATIVE_REGULATION_OF_CELL_KILLING		18	0.627988	1.66247	0.0185185	0.048556	1	2942	tags=56%, list=15%, signal=65%
GO_ALPHA_AMINO_ACID_BIOSYNTHETIC_PROCESS	GO_ALPHA_AMINO_ACID_BIOSYNTHETIC_PROCESS		62	0.489038	1.65984	0	0.0496716	1	3400	tags=35%, list=18%, signal=43%
GO_MEMBRANE_DOCKING	GO_MEMBRANE_DOCKING		177	0.414861	1.65782	0	0.0504687	1	4128	tags=34%, list=21%, signal=43%
GO_DNA_INTEGRITY_CHECKPOINT	GO_DNA_INTEGRITY_CHECKPOINT		156	0.421375	1.65449	0	0.0520241	1	2487	tags=29%, list=13%, signal=33%
GO_HETEROCHROMATIN_ORGANIZATION	GO_HETEROCHROMATIN_ORGANIZATION		17	0.639976	1.65004	0.0178571	0.0536543	1	2781	tags=47%, list=14%, signal=55%
GO_MEIOTIC_CHROMOSOME_SEPARATION	GO_MEIOTIC_CHROMOSOME_SEPARATION		25	0.584905	1.65048	0.0106157	0.0536738	1	3419	tags=48%, list=18%, signal=58%
GO_OOGENESIS	GO_OOGENESIS		82	0.467188	1.65096	0	0.0536829	1	3192	tags=33%, list=16%, signal=39%
GO_POSITIVE_REGULATION_OF_LYMPHOCYTE_MEDIATED_IMMUNITY	GO_POSITIVE_REGULATION_OF_LYMPHOCYTE_MEDIATED_IMMUNITY		98	0.444687	1.6478	0	0.0546685	1	4127	tags=42%, list=21%, signal=53%
GO_POSITIVE_REGULATION_OF_GLIAL_CELL_PROLIFERATION	GO_POSITIVE_REGULATION_OF_GLIAL_CELL_PROLIFERATION		16	0.643974	1.64528	0.0160643	0.0558943	1	1256	tags=38%, list=6%, signal=40%
GO_RESPONSE_TO_ZINC_ION	GO_RESPONSE_TO_ZINC_ION		54	0.492971	1.638	0.00206612	0.0588477	1	1927	tags=30%, list=10%, signal=33%
GO_INFLAMMATORY_CELL_APOPTOTIC_PROCESS	GO_INFLAMMATORY_CELL_APOPTOTIC_PROCESS		21	0.59551	1.63822	0.00957854	0.0590016	1	3257	tags=48%, list=17%, signal=57%
GO_REGULATION_OF_CENTRIOLE_REPLICATION	GO_REGULATION_OF_CENTRIOLE_REPLICATION		22	0.585882	1.63894	0.0149573	0.0590198	1	1851	tags=36%, list=10%, signal=40%
GO_MEMBRANE_DISASSEMBLY	GO_MEMBRANE_DISASSEMBLY		16	0.635333	1.6383	0.012474	0.0592134	1	1591	tags=38%, list=8%, signal=41%
GO_T_CELL_ACTIVATION_INVOLVED_IN_IMMUNE_RESPONSE	GO_T_CELL_ACTIVATION_INVOLVED_IN_IMMUNE_RESPONSE		98	0.375659	1.39409	0.0106838	0.0595891	1	3815	tags=35%, list=20%, signal=43%
GO_POSITIVE_REGULATION_OF_ACUTE_INFLAMMATORY_RESPONSE	GO_POSITIVE_REGULATION_OF_ACUTE_INFLAMMATORY_RESPONSE		28	0.573979	1.6329	0.0133333	0.0613073	1	1707	tags=32%, list=9%, signal=35%
GO_NCRNA_EXPORT_FROM_NUCLEUS	GO_NCRNA_EXPORT_FROM_NUCLEUS		39	0.514705	1.63139	0.00843882	0.0615994	1	6071	tags=64%, list=31%, signal=93%
GO_LYMPHOCYTE_CHEMOTAXIS	GO_LYMPHOCYTE_CHEMOTAXIS		60	0.478804	1.63006	0.00211416	0.0620707	1	2047	tags=37%, list=11%, signal=41%
GO_REGULATION_OF_CELL_KILLING	GO_REGULATION_OF_CELL_KILLING		83	0.453033	1.62895	0.00223714	0.062412	1	3098	tags=36%, list=16%, signal=43%
GO_INTERFERON_GAMMA_PRODUCTION	GO_INTERFERON_GAMMA_PRODUCTION		105	0.429576	1.62757	0	0.063015	1	4127	tags=49%, list=21%, signal=61%
GO_POSITIVE_REGULATION_OF_CHROMOSOME_SEGREGATION	GO_POSITIVE_REGULATION_OF_CHROMOSOME_SEGREGATION		28	0.56077	1.62604	0.0102041	0.0635877	1	2516	tags=36%, list=13%, signal=41%
GO_PIRNA_METABOLIC_PROCESS	GO_PIRNA_METABOLIC_PROCESS		17	0.627571	1.62508	0.026749	0.0639054	1	2923	tags=41%, list=15%, signal=48%
GO_RESPONSE_TO_VIRUS	GO_RESPONSE_TO_VIRUS		319	0.378594	1.62441	0	0.0640203	1	2991	tags=26%, list=15%, signal=30%
GO_MYELOID_CELL_APOPTOTIC_PROCESS	GO_MYELOID_CELL_APOPTOTIC_PROCESS		32	0.547183	1.62225	0.010661	0.0648244	1	3120	tags=44%, list=16%, signal=52%
GO_REGULATION_OF_GENE_SILENCING	GO_REGULATION_OF_GENE_SILENCING		146	0.409997	1.61746	0	0.0677216	1	4860	tags=36%, list=25%, signal=48%
GO_MODIFICATION_OF_MORPHOLOGY_OR_PHYSIOLOGY_OF_OTHER_ORGANISM	GO_MODIFICATION_OF_MORPHOLOGY_OR_PHYSIOLOGY_OF_OTHER_ORGANISM		157	0.408763	1.61676	0	0.0678557	1	3584	tags=31%, list=19%, signal=37%
GO_TOLL_LIKE_RECEPTOR_2_SIGNALING_PATHWAY	GO_TOLL_LIKE_RECEPTOR_2_SIGNALING_PATHWAY		15	0.642562	1.61446	0.0166667	0.068911	1	3491	tags=67%, list=18%, signal=81%
GO_REGULATION_OF_CENTROSOME_DUPLICATION	GO_REGULATION_OF_CENTROSOME_DUPLICATION		43	0.515852	1.61472	0.0127389	0.0690347	1	4981	tags=49%, list=26%, signal=66%
GO_REGULATION_OF_T_CELL_CHEMOTAXIS	GO_REGULATION_OF_T_CELL_CHEMOTAXIS		16	0.628461	1.60987	0.0239044	0.0715782	1	2041	tags=44%, list=11%, signal=49%
GO_REGULATION_OF_MICROTUBULE_BASED_PROCESS	GO_REGULATION_OF_MICROTUBULE_BASED_PROCESS		210	0.392477	1.60129	0	0.0769473	1	3897	tags=33%, list=20%, signal=41%
GO_PYRIMIDINE_NUCLEOSIDE_MONOPHOSPHATE_BIOSYNTHETIC_PROCESS	GO_PYRIMIDINE_NUCLEOSIDE_MONOPHOSPHATE_BIOSYNTHETIC_PROCESS		16	0.629998	1.59925	0.0229167	0.077768	1	2697	tags=38%, list=14%, signal=44%
GO_NEGATIVE_REGULATION_OF_HISTONE_METHYLATION	GO_NEGATIVE_REGULATION_OF_HISTONE_METHYLATION		21	0.576757	1.5994	0.0157791	0.0779987	1	1649	tags=24%, list=9%, signal=26%
GO_BLASTOCYST_GROWTH	GO_BLASTOCYST_GROWTH		19	0.594377	1.59718	0.0143737	0.0785276	1	1080	tags=26%, list=6%, signal=28%
GO_DNA_TEMPLATED_TRANSCRIPTION_TERMINATION	GO_DNA_TEMPLATED_TRANSCRIPTION_TERMINATION		74	0.451042	1.5964	0.00406504	0.0787267	1	5452	tags=50%, list=28%, signal=69%
GO_MRNA_TRANSPORT	GO_MRNA_TRANSPORT		148	0.40535	1.59727	0	0.0787803	1	5544	tags=42%, list=29%, signal=58%
GO_FEMALE_GAMETE_GENERATION	GO_FEMALE_GAMETE_GENERATION		131	0.411963	1.5955	0	0.0789207	1	1216	tags=19%, list=6%, signal=20%
GO_RESPONSE_TO_INTERLEUKIN_12	GO_RESPONSE_TO_INTERLEUKIN_12		50	0.490631	1.5906	0.00412371	0.0823968	1	3847	tags=36%, list=20%, signal=45%
GO_GLIAL_CELL_ACTIVATION	GO_GLIAL_CELL_ACTIVATION		45	0.49577	1.5891	0.0145833	0.0825222	1	2731	tags=42%, list=14%, signal=49%
GO_CELLULAR_RESPONSE_TO_DSRNA	GO_CELLULAR_RESPONSE_TO_DSRNA		22	0.575961	1.58956	0.0258964	0.0825268	1	1042	tags=27%, list=5%, signal=29%
GO_POSITIVE_REGULATION_OF_HISTONE_METHYLATION	GO_POSITIVE_REGULATION_OF_HISTONE_METHYLATION		37	0.503743	1.58998	0.02537	0.0825334	1	3280	tags=30%, list=17%, signal=36%
GO_PODOSOME_ASSEMBLY	GO_PODOSOME_ASSEMBLY		19	0.597769	1.58797	0.0191083	0.0827104	1	2765	tags=42%, list=14%, signal=49%
GO_RESPONSE_TO_TESTOSTERONE	GO_RESPONSE_TO_TESTOSTERONE		41	0.500611	1.58832	0.00628931	0.0827725	1	3709	tags=44%, list=19%, signal=54%
GO_DNA_METHYLATION	GO_DNA_METHYLATION		65	0.458383	1.58351	0.00448431	0.0828078	1	3929	tags=37%, list=20%, signal=46%
GO_MITOTIC_SISTER_CHROMATID_COHESION	GO_MITOTIC_SISTER_CHROMATID_COHESION		22	0.572045	1.58247	0.00817996	0.0829209	1	3370	tags=41%, list=17%, signal=49%
GO_NEGATIVE_REGULATION_OF_MEIOTIC_CELL_CYCLE	GO_NEGATIVE_REGULATION_OF_MEIOTIC_CELL_CYCLE		16	0.610969	1.58374	0.0291667	0.0829472	1	2199	tags=44%, list=11%, signal=49%
GO_HISTONE_PHOSPHORYLATION	GO_HISTONE_PHOSPHORYLATION		38	0.511607	1.58247	0.0192719	0.083246	1	794	tags=26%, list=4%, signal=27%
GO_NEGATIVE_REGULATION_OF_PEPTIDYL_LYSINE_ACETYLATION	GO_NEGATIVE_REGULATION_OF_PEPTIDYL_LYSINE_ACETYLATION		19	0.608016	1.58375	0.0163934	0.0832764	1	4036	tags=53%, list=21%, signal=66%
GO_REGULATION_OF_IMMUNOGLOBULIN_PRODUCTION	GO_REGULATION_OF_IMMUNOGLOBULIN_PRODUCTION		65	0.456882	1.58376	0.00444444	0.0836043	1	3880	tags=43%, list=20%, signal=54%
GO_POSITIVE_REGULATION_OF_SMOOTH_MUSCLE_CELL_APOPTOTIC_PROCESS	GO_POSITIVE_REGULATION_OF_SMOOTH_MUSCLE_CELL_APOPTOTIC_PROCESS		15	0.639379	1.58378	0.0336634	0.0839229	1	1712	tags=27%, list=9%, signal=29%
GO_POSITIVE_REGULATION_OF_UBIQUITIN_PROTEIN_TRANSFERASE_ACTIVITY	GO_POSITIVE_REGULATION_OF_UBIQUITIN_PROTEIN_TRANSFERASE_ACTIVITY		33	0.523618	1.58513	0.0117878	0.0840621	1	997	tags=21%, list=5%, signal=22%
GO_PROTEIN_LOCALIZATION_TO_CHROMATIN	GO_PROTEIN_LOCALIZATION_TO_CHROMATIN		28	0.539114	1.58409	0.0275424	0.0840806	1	1033	tags=21%, list=5%, signal=23%
GO_CELL_KILLING	GO_CELL_KILLING		152	0.401046	1.58464	0.00232558	0.0840873	1	3522	tags=32%, list=18%, signal=38%
GO_POSITIVE_REGULATION_OF_LEUKOCYTE_MEDIATED_IMMUNITY	GO_POSITIVE_REGULATION_OF_LEUKOCYTE_MEDIATED_IMMUNITY		125	0.4161	1.58547	0	0.0841738	1	4127	tags=39%, list=21%, signal=49%
GO_NEUROINFLAMMATORY_RESPONSE	GO_NEUROINFLAMMATORY_RESPONSE		56	0.4668	1.57923	0.00663717	0.0843528	1	4065	tags=50%, list=21%, signal=63%
GO_RIBONUCLEOSIDE_MONOPHOSPHATE_BIOSYNTHETIC_PROCESS	GO_RIBONUCLEOSIDE_MONOPHOSPHATE_BIOSYNTHETIC_PROCESS		33	0.53028	1.57934	0.0122699	0.0846064	1	3037	tags=39%, list=16%, signal=47%
GO_MITOTIC_G2_DNA_DAMAGE_CHECKPOINT	GO_MITOTIC_G2_DNA_DAMAGE_CHECKPOINT		20	0.587551	1.57668	0.0191489	0.0857	1	1247	tags=30%, list=6%, signal=32%
GO_DEFENSE_RESPONSE_TO_BACTERIUM	GO_DEFENSE_RESPONSE_TO_BACTERIUM		247	0.379109	1.57687	0	0.0858763	1	2450	tags=21%, list=13%, signal=23%
GO_NEURONAL_STEM_CELL_POPULATION_MAINTENANCE	GO_NEURONAL_STEM_CELL_POPULATION_MAINTENANCE		21	0.584882	1.57484	0.0233051	0.0866889	1	1037	tags=33%, list=5%, signal=35%
GO_KILLING_OF_CELLS_OF_OTHER_ORGANISM	GO_KILLING_OF_CELLS_OF_OTHER_ORGANISM		60	0.463621	1.56728	0.00828157	0.0916169	1	2450	tags=25%, list=13%, signal=29%
GO_NEGATIVE_REGULATION_OF_CYTOKINE_SECRETION	GO_NEGATIVE_REGULATION_OF_CYTOKINE_SECRETION		63	0.454713	1.56742	0.00621118	0.0918551	1	3043	tags=38%, list=16%, signal=45%
GO_INTERLEUKIN_7_MEDIATED_SIGNALING_PATHWAY	GO_INTERLEUKIN_7_MEDIATED_SIGNALING_PATHWAY		28	0.542025	1.56527	0.0179283	0.0928885	1	1348	tags=21%, list=7%, signal=23%
GO_NEGATIVE_REGULATION_OF_UBIQUITIN_PROTEIN_TRANSFERASE_ACTIVITY	GO_NEGATIVE_REGULATION_OF_UBIQUITIN_PROTEIN_TRANSFERASE_ACTIVITY		16	0.616894	1.56285	0.0297872	0.0945418	1	2819	tags=38%, list=15%, signal=44%
GO_HOMOLOGOUS_RECOMBINATION	GO_HOMOLOGOUS_RECOMBINATION		54	0.471005	1.5624	0.00998004	0.094582	1	3468	tags=37%, list=18%, signal=45%
GO_POSITIVE_REGULATION_OF_LEUKOCYTE_CELL_CELL_ADHESION	GO_POSITIVE_REGULATION_OF_LEUKOCYTE_CELL_CELL_ADHESION		207	0.37547	1.55817	0	0.0979041	1	3054	tags=32%, list=16%, signal=37%
GO_CYTOLYSIS	GO_CYTOLYSIS		40	0.494621	1.55772	0.0195228	0.0979133	1	2450	tags=33%, list=13%, signal=37%
GO_CELL_AGGREGATION	GO_CELL_AGGREGATION		21	0.565414	1.55442	0.0250522	0.0983735	1	3005	tags=43%, list=16%, signal=51%
GO_GLYCOSYL_COMPOUND_BIOSYNTHETIC_PROCESS	GO_GLYCOSYL_COMPOUND_BIOSYNTHETIC_PROCESS		41	0.49595	1.5566	0.0145833	0.0984387	1	2697	tags=34%, list=14%, signal=40%
GO_LEUKOCYTE_CHEMOTAXIS	GO_LEUKOCYTE_CHEMOTAXIS		214	0.381378	1.55447	0.00212314	0.0986915	1	2382	tags=29%, list=12%, signal=33%
GO_REGULATION_OF_EXIT_FROM_MITOSIS	GO_REGULATION_OF_EXIT_FROM_MITOSIS		19	0.578277	1.55588	0.0269151	0.0986951	1	2532	tags=32%, list=13%, signal=36%
GO_DEOXYRIBONUCLEOTIDE_BIOSYNTHETIC_PROCESS	GO_DEOXYRIBONUCLEOTIDE_BIOSYNTHETIC_PROCESS		15	0.617513	1.55534	0.0254777	0.0987999	1	2829	tags=47%, list=15%, signal=55%
GO_REGULATION_OF_CHROMATIN_SILENCING	GO_REGULATION_OF_CHROMATIN_SILENCING		34	0.516726	1.55465	0.0145833	0.0989175	1	5421	tags=41%, list=28%, signal=57%
GO_RESPONSE_TO_INTERLEUKIN_1	GO_RESPONSE_TO_INTERLEUKIN_1		194	0.382275	1.55287	0.00226244	0.099353	1	4824	tags=41%, list=25%, signal=54%
GO_NEGATIVE_REGULATION_OF_PROTEIN_ACETYLATION	GO_NEGATIVE_REGULATION_OF_PROTEIN_ACETYLATION		23	0.558692	1.55129	0.0235546	0.100009	1	4036	tags=43%, list=21%, signal=55%
GO_REGULATION_OF_CELL_CYCLE_CHECKPOINT	GO_REGULATION_OF_CELL_CYCLE_CHECKPOINT		32	0.521145	1.55143	0.016632	0.100254	1	3794	tags=44%, list=20%, signal=54%
GO_HUMORAL_IMMUNE_RESPONSE_MEDIATED_BY_CIRCULATING_IMMUNOGLOBULIN	GO_HUMORAL_IMMUNE_RESPONSE_MEDIATED_BY_CIRCULATING_IMMUNOGLOBULIN		46	0.483305	1.54722	0.0167015	0.10305	1	2698	tags=37%, list=14%, signal=43%
GO_CELLULAR_RESPONSE_TO_EXOGENOUS_DSRNA	GO_CELLULAR_RESPONSE_TO_EXOGENOUS_DSRNA		17	0.610885	1.54623	0.0238612	0.10322	1	882	tags=29%, list=5%, signal=31%
GO_CELL_AGING	GO_CELL_AGING		103	0.413777	1.54626	0.00440529	0.103562	1	1552	tags=19%, list=8%, signal=21%
GO_LEUKOCYTE_CELL_CELL_ADHESION	GO_LEUKOCYTE_CELL_CELL_ADHESION		318	0.362219	1.5435	0	0.105272	1	3880	tags=36%, list=20%, signal=44%
GO_DEFENSE_RESPONSE_TO_GRAM_POSITIVE_BACTERIUM	GO_DEFENSE_RESPONSE_TO_GRAM_POSITIVE_BACTERIUM		93	0.414953	1.54182	0	0.106438	1	1841	tags=24%, list=10%, signal=26%
GO_REGULATION_OF_LYMPHOCYTE_MEDIATED_IMMUNITY	GO_REGULATION_OF_LYMPHOCYTE_MEDIATED_IMMUNITY		143	0.393123	1.53981	0	0.107846	1	4127	tags=40%, list=21%, signal=50%
GO_ESTABLISHMENT_OF_PROTEIN_LOCALIZATION_TO_TELOMERE	GO_ESTABLISHMENT_OF_PROTEIN_LOCALIZATION_TO_TELOMERE		18	0.584067	1.53907	0.0349076	0.108187	1	4500	tags=67%, list=23%, signal=87%
GO_PTERIDINE_CONTAINING_COMPOUND_METABOLIC_PROCESS	GO_PTERIDINE_CONTAINING_COMPOUND_METABOLIC_PROCESS		27	0.537219	1.53757	0.0236052	0.108351	1	3400	tags=52%, list=18%, signal=63%
GO_MRNA_EXPORT_FROM_NUCLEUS	GO_MRNA_EXPORT_FROM_NUCLEUS		111	0.406438	1.53768	0.00655022	0.108627	1	5731	tags=43%, list=30%, signal=61%
GO_SERINE_FAMILY_AMINO_ACID_METABOLIC_PROCESS	GO_SERINE_FAMILY_AMINO_ACID_METABOLIC_PROCESS		38	0.495073	1.53782	0.020284	0.108871	1	2964	tags=37%, list=15%, signal=43%
GO_REGULATION_OF_DOUBLE_STRAND_BREAK_REPAIR_VIA_NONHOMOLOGOUS_END_JOINING	GO_REGULATION_OF_DOUBLE_STRAND_BREAK_REPAIR_VIA_NONHOMOLOGOUS_END_JOINING		22	0.547376	1.53629	0.0352697	0.109174	1	3280	tags=50%, list=17%, signal=60%
GO_MULTI_ORGANISM_LOCALIZATION	GO_MULTI_ORGANISM_LOCALIZATION		71	0.433665	1.53338	0.00209644	0.111422	1	5012	tags=48%, list=26%, signal=64%
GO_ESTABLISHMENT_OF_ORGANELLE_LOCALIZATION	GO_ESTABLISHMENT_OF_ORGANELLE_LOCALIZATION		489	0.344422	1.53298	0	0.111434	1	3897	tags=29%, list=20%, signal=35%
GO_CELLULAR_PROCESS_INVOLVED_IN_REPRODUCTION_IN_MULTICELLULAR_ORGANISM	GO_CELLULAR_PROCESS_INVOLVED_IN_REPRODUCTION_IN_MULTICELLULAR_ORGANISM		341	0.353981	1.53255	0	0.11144	1	3026	tags=23%, list=16%, signal=27%
GO_REGULATION_OF_GENE_EXPRESSION_EPIGENETIC	GO_REGULATION_OF_GENE_EXPRESSION_EPIGENETIC		321	0.361809	1.531	0	0.112364	1	4860	tags=34%, list=25%, signal=45%
GO_POSITIVE_REGULATION_OF_MONONUCLEAR_CELL_MIGRATION	GO_POSITIVE_REGULATION_OF_MONONUCLEAR_CELL_MIGRATION		23	0.545118	1.52716	0.0288889	0.115351	1	1243	tags=35%, list=6%, signal=37%
GO_POSITIVE_REGULATION_OF_HISTONE_H3_K4_METHYLATION	GO_POSITIVE_REGULATION_OF_HISTONE_H3_K4_METHYLATION		16	0.600168	1.52524	0.0385396	0.116855	1	2736	tags=38%, list=14%, signal=44%
GO_CEREBRAL_CORTEX_DEVELOPMENT	GO_CEREBRAL_CORTEX_DEVELOPMENT		112	0.409643	1.52423	0.00641026	0.117373	1	3170	tags=33%, list=16%, signal=39%
GO_RESPONSE_TO_INTERLEUKIN_7	GO_RESPONSE_TO_INTERLEUKIN_7		38	0.48514	1.52248	0.0149573	0.118601	1	1515	tags=21%, list=8%, signal=23%
GO_TYPE_I_INTERFERON_PRODUCTION	GO_TYPE_I_INTERFERON_PRODUCTION		125	0.402152	1.5216	0.00632911	0.118986	1	3491	tags=30%, list=18%, signal=37%
GO_LYMPHOCYTE_MEDIATED_IMMUNITY	GO_LYMPHOCYTE_MEDIATED_IMMUNITY		239	0.372979	1.52109	0	0.119116	1	3518	tags=33%, list=18%, signal=40%
GO_NEGATIVE_REGULATION_OF_DOUBLE_STRAND_BREAK_REPAIR_VIA_HOMOLOGOUS_RECOMBINATION	GO_NEGATIVE_REGULATION_OF_DOUBLE_STRAND_BREAK_REPAIR_VIA_HOMOLOGOUS_RECOMBINATION		18	0.568392	1.51967	0.0309735	0.119664	1	4073	tags=56%, list=21%, signal=70%
GO_GLUTAMINE_METABOLIC_PROCESS	GO_GLUTAMINE_METABOLIC_PROCESS		21	0.547204	1.51983	0.0188679	0.119909	1	2490	tags=33%, list=13%, signal=38%
GO_PHAGOCYTOSIS	GO_PHAGOCYTOSIS		252	0.360289	1.51783	0	0.121004	1	2862	tags=28%, list=15%, signal=33%
GO_CYTOKINE_SECRETION	GO_CYTOKINE_SECRETION		214	0.373153	1.51672	0	0.121681	1	3677	tags=34%, list=19%, signal=42%
GO_COPPER_ION_HOMEOSTASIS	GO_COPPER_ION_HOMEOSTASIS		16	0.60587	1.5143	0.0440882	0.123734	1	1139	tags=19%, list=6%, signal=20%
GO_ACUTE_INFLAMMATORY_RESPONSE	GO_ACUTE_INFLAMMATORY_RESPONSE		106	0.402252	1.51279	0	0.124721	1	3677	tags=37%, list=19%, signal=45%
GO_REGULATION_OF_LYMPHOCYTE_ACTIVATION	GO_REGULATION_OF_LYMPHOCYTE_ACTIVATION		404	0.347149	1.51176	0	0.125295	1	3880	tags=34%, list=20%, signal=42%
GO_TERMINATION_OF_RNA_POLYMERASE_II_TRANSCRIPTION	GO_TERMINATION_OF_RNA_POLYMERASE_II_TRANSCRIPTION		34	0.500582	1.50999	0.0321932	0.126645	1	5386	tags=53%, list=28%, signal=73%
GO_MALE_MEIOSIS_I	GO_MALE_MEIOSIS_I		24	0.537836	1.50952	0.0282258	0.126712	1	3385	tags=33%, list=17%, signal=40%
GO_RESPONSE_TO_IONIZING_RADIATION	GO_RESPONSE_TO_IONIZING_RADIATION		147	0.381432	1.50837	0.00666667	0.127049	1	1998	tags=21%, list=10%, signal=23%
GO_REGULATION_OF_MEIOTIC_CELL_CYCLE	GO_REGULATION_OF_MEIOTIC_CELL_CYCLE		47	0.46101	1.50865	0.0201342	0.127148	1	1196	tags=23%, list=6%, signal=25%
GO_RESPONSE_TO_DEXAMETHASONE	GO_RESPONSE_TO_DEXAMETHASONE		42	0.470805	1.50764	0.0289855	0.127403	1	1970	tags=26%, list=10%, signal=29%
GO_CELLULAR_METABOLIC_COMPOUND_SALVAGE	GO_CELLULAR_METABOLIC_COMPOUND_SALVAGE		35	0.490616	1.50629	0.0418502	0.128279	1	3837	tags=37%, list=20%, signal=46%
GO_REGULATION_OF_MONONUCLEAR_CELL_MIGRATION	GO_REGULATION_OF_MONONUCLEAR_CELL_MIGRATION		44	0.466805	1.50533	0.0235546	0.128458	1	1676	tags=32%, list=9%, signal=35%
GO_NEGATIVE_REGULATION_OF_VIRAL_GENOME_REPLICATION	GO_NEGATIVE_REGULATION_OF_VIRAL_GENOME_REPLICATION		56	0.443656	1.50555	0.00410678	0.128652	1	2857	tags=29%, list=15%, signal=33%
GO_REGULATION_OF_LEUKOCYTE_MEDIATED_IMMUNITY	GO_REGULATION_OF_LEUKOCYTE_MEDIATED_IMMUNITY		193	0.373211	1.50419	0.00220751	0.129198	1	3484	tags=33%, list=18%, signal=40%
GO_MISMATCH_REPAIR	GO_MISMATCH_REPAIR		34	0.492096	1.50332	0.0235546	0.129776	1	2143	tags=32%, list=11%, signal=36%
GO_LEUKOCYTE_ACTIVATION_INVOLVED_IN_INFLAMMATORY_RESPONSE	GO_LEUKOCYTE_ACTIVATION_INVOLVED_IN_INFLAMMATORY_RESPONSE		37	0.492217	1.50166	0.0398323	0.131015	1	3607	tags=54%, list=19%, signal=66%
GO_TELOMERASE_RNA_LOCALIZATION	GO_TELOMERASE_RNA_LOCALIZATION		19	0.561665	1.49612	0.0335306	0.135692	1	4500	tags=53%, list=23%, signal=68%
GO_TUBE_CLOSURE	GO_TUBE_CLOSURE		90	0.410395	1.49687	0.00452489	0.13574	1	2559	tags=26%, list=13%, signal=29%
GO_POSITIVE_REGULATION_OF_T_CELL_MEDIATED_IMMUNITY	GO_POSITIVE_REGULATION_OF_T_CELL_MEDIATED_IMMUNITY		39	0.47332	1.49642	0.0248447	0.135828	1	4127	tags=51%, list=21%, signal=65%
GO_POSITIVE_REGULATION_OF_VASCULAR_ENDOTHELIAL_GROWTH_FACTOR_PRODUCTION	GO_POSITIVE_REGULATION_OF_VASCULAR_ENDOTHELIAL_GROWTH_FACTOR_PRODUCTION		27	0.518123	1.49467	0.0418502	0.13687	1	2743	tags=37%, list=14%, signal=43%
GO_ERROR_PRONE_TRANSLESION_SYNTHESIS	GO_ERROR_PRONE_TRANSLESION_SYNTHESIS		20	0.555584	1.49386	0.04158	0.136885	1	3468	tags=55%, list=18%, signal=67%
GO_REGULATION_OF_PODOSOME_ASSEMBLY	GO_REGULATION_OF_PODOSOME_ASSEMBLY		15	0.593933	1.49217	0.0418502	0.136935	1	2765	tags=40%, list=14%, signal=47%
GO_NEGATIVE_REGULATION_OF_INTERLEUKIN_1_SECRETION	GO_NEGATIVE_REGULATION_OF_INTERLEUKIN_1_SECRETION		15	0.589768	1.49295	0.0488798	0.137045	1	2200	tags=33%, list=11%, signal=38%
GO_PROTEIN_LOCALIZATION_TO_MICROTUBULE_ORGANIZING_CENTER	GO_PROTEIN_LOCALIZATION_TO_MICROTUBULE_ORGANIZING_CENTER		31	0.499213	1.49248	0.038	0.137065	1	1166	tags=16%, list=6%, signal=17%
GO_POSITIVE_REGULATION_OF_CYTOKINE_PRODUCTION	GO_POSITIVE_REGULATION_OF_CYTOKINE_PRODUCTION		434	0.338387	1.49394	0	0.13721	1	4057	tags=32%, list=21%, signal=40%
GO_RESPONSE_TO_ANTINEOPLASTIC_AGENT	GO_RESPONSE_TO_ANTINEOPLASTIC_AGENT		94	0.405814	1.49131	0.00430108	0.137468	1	2629	tags=23%, list=14%, signal=27%
GO_POSITIVE_REGULATION_OF_CD4_POSITIVE_ALPHA_BETA_T_CELL_ACTIVATION	GO_POSITIVE_REGULATION_OF_CD4_POSITIVE_ALPHA_BETA_T_CELL_ACTIVATION		34	0.492411	1.48932	0.0369565	0.137844	1	4125	tags=50%, list=21%, signal=63%
GO_OOCYTE_DIFFERENTIATION	GO_OOCYTE_DIFFERENTIATION		50	0.457584	1.48886	0.0204499	0.137943	1	3026	tags=32%, list=16%, signal=38%
GO_POSITIVE_REGULATION_OF_T_HELPER_1_TYPE_IMMUNE_RESPONSE	GO_POSITIVE_REGULATION_OF_T_HELPER_1_TYPE_IMMUNE_RESPONSE		20	0.543459	1.48985	0.0466531	0.138154	1	4127	tags=60%, list=21%, signal=76%
GO_TRANSPORT_OF_VIRUS	GO_TRANSPORT_OF_VIRUS		58	0.436304	1.48937	0.0278373	0.138217	1	5012	tags=47%, list=26%, signal=63%
GO_POSITIVE_REGULATION_OF_TYPE_I_INTERFERON_PRODUCTION	GO_POSITIVE_REGULATION_OF_TYPE_I_INTERFERON_PRODUCTION		77	0.419157	1.48993	0.0221239	0.138506	1	2445	tags=23%, list=13%, signal=27%
GO_RESPONSE_TO_INTERLEUKIN_6	GO_RESPONSE_TO_INTERLEUKIN_6		38	0.480057	1.48652	0.021097	0.140007	1	2699	tags=29%, list=14%, signal=34%
GO_CELLULAR_SENESCENCE	GO_CELLULAR_SENESCENCE		65	0.424591	1.48518	0.0176211	0.140976	1	1552	tags=22%, list=8%, signal=23%
GO_DNA_BIOSYNTHETIC_PROCESS	GO_DNA_BIOSYNTHETIC_PROCESS		187	0.365592	1.48366	0	0.141365	1	3860	tags=32%, list=20%, signal=40%
GO_NUCLEOSOME_POSITIONING	GO_NUCLEOSOME_POSITIONING		15	0.585552	1.48399	0.046875	0.141398	1	4711	tags=47%, list=24%, signal=62%
GO_INNATE_IMMUNE_RESPONSE_IN_MUCOSA	GO_INNATE_IMMUNE_RESPONSE_IN_MUCOSA		24	0.523444	1.48285	0.0467836	0.14177	1	1458	tags=21%, list=8%, signal=23%
GO_SOMATIC_DIVERSIFICATION_OF_IMMUNE_RECEPTORS	GO_SOMATIC_DIVERSIFICATION_OF_IMMUNE_RECEPTORS		66	0.427098	1.4793	0.0172043	0.144378	1	4366	tags=42%, list=23%, signal=55%
GO_POSITIVE_REGULATION_OF_DNA_METABOLIC_PROCESS	GO_POSITIVE_REGULATION_OF_DNA_METABOLIC_PROCESS		157	0.373674	1.47998	0.00431035	0.144473	1	5042	tags=43%, list=26%, signal=57%
GO_POSITIVE_REGULATION_OF_DEFENSE_RESPONSE	GO_POSITIVE_REGULATION_OF_DEFENSE_RESPONSE		486	0.335344	1.47932	0	0.144771	1	3710	tags=30%, list=19%, signal=37%
GO_CHONDROCYTE_DEVELOPMENT	GO_CHONDROCYTE_DEVELOPMENT		47	0.452603	1.47715	0.026087	0.145939	1	2529	tags=32%, list=13%, signal=37%
GO_NEGATIVE_REGULATION_OF_INTERFERON_GAMMA_PRODUCTION	GO_NEGATIVE_REGULATION_OF_INTERFERON_GAMMA_PRODUCTION		32	0.498015	1.47617	0.0339321	0.146565	1	2942	tags=47%, list=15%, signal=55%
GO_REGULATION_OF_T_CELL_ACTIVATION	GO_REGULATION_OF_T_CELL_ACTIVATION		302	0.350051	1.47355	0	0.147797	1	3880	tags=36%, list=20%, signal=44%
GO_CELLULAR_DEFENSE_RESPONSE	GO_CELLULAR_DEFENSE_RESPONSE		51	0.446121	1.4743	0.027957	0.147836	1	2462	tags=31%, list=13%, signal=36%
GO_REGULATION_OF_LYMPHOCYTE_CHEMOTAXIS	GO_REGULATION_OF_LYMPHOCYTE_CHEMOTAXIS		25	0.531769	1.47363	0.0456349	0.148126	1	2041	tags=48%, list=11%, signal=54%
GO_RESPONSE_TO_DSRNA	GO_RESPONSE_TO_DSRNA		54	0.43794	1.47152	0.025641	0.149719	1	5664	tags=39%, list=29%, signal=55%
GO_REGULATION_OF_DEFENSE_RESPONSE_TO_VIRUS_BY_HOST	GO_REGULATION_OF_DEFENSE_RESPONSE_TO_VIRUS_BY_HOST		37	0.475887	1.46895	0.0193966	0.152252	1	2991	tags=35%, list=15%, signal=41%
GO_POSITIVE_REGULATION_OF_CELL_ACTIVATION	GO_POSITIVE_REGULATION_OF_CELL_ACTIVATION		313	0.342926	1.46794	0	0.152988	1	3054	tags=30%, list=16%, signal=35%
GO_REGULATION_OF_KILLING_OF_CELLS_OF_OTHER_ORGANISM	GO_REGULATION_OF_KILLING_OF_CELLS_OF_OTHER_ORGANISM		15	0.590079	1.46685	0.0474308	0.15379	1	2450	tags=47%, list=13%, signal=53%
GO_ASTROCYTE_DEVELOPMENT	GO_ASTROCYTE_DEVELOPMENT		38	0.471912	1.46412	0.039916	0.153822	1	3478	tags=45%, list=18%, signal=54%
GO_POSITIVE_REGULATION_OF_LYMPHOCYTE_ACTIVATION	GO_POSITIVE_REGULATION_OF_LYMPHOCYTE_ACTIVATION		258	0.350533	1.46426	0	0.154106	1	3054	tags=30%, list=16%, signal=35%
GO_POSITIVE_REGULATION_OF_NUCLEAR_DIVISION	GO_POSITIVE_REGULATION_OF_NUCLEAR_DIVISION		66	0.42175	1.46613	0.0186722	0.154147	1	1694	tags=23%, list=9%, signal=25%
GO_POSITIVE_REGULATION_OF_INTERFERON_GAMMA_PRODUCTION	GO_POSITIVE_REGULATION_OF_INTERFERON_GAMMA_PRODUCTION		61	0.423943	1.46433	0.0218818	0.154421	1	4617	tags=52%, list=24%, signal=69%
GO_POSITIVE_REGULATION_OF_DNA_RECOMBINATION	GO_POSITIVE_REGULATION_OF_DNA_RECOMBINATION		42	0.460297	1.4653	0.0387097	0.15465	1	3764	tags=40%, list=19%, signal=50%
GO_CIRCADIAN_SLEEP_WAKE_CYCLE_SLEEP	GO_CIRCADIAN_SLEEP_WAKE_CYCLE_SLEEP		20	0.554776	1.46436	0.0475207	0.15482	1	334	tags=15%, list=2%, signal=15%
GO_NEGATIVE_REGULATION_OF_BONE_MINERALIZATION	GO_NEGATIVE_REGULATION_OF_BONE_MINERALIZATION		17	0.570019	1.46459	0.0469667	0.154988	1	1095	tags=35%, list=6%, signal=37%
GO_T_CELL_ACTIVATION	GO_T_CELL_ACTIVATION		447	0.331236	1.46111	0	0.156159	1	3880	tags=33%, list=20%, signal=41%
GO_SOMATIC_DIVERSIFICATION_OF_IMMUNE_RECEPTORS_VIA_GERMLINE_RECOMBINATION_WITHIN_A_SINGLE_LOCUS	GO_SOMATIC_DIVERSIFICATION_OF_IMMUNE_RECEPTORS_VIA_GERMLINE_RECOMBINATION_WITHIN_A_SINGLE_LOCUS		60	0.421895	1.46131	0.0280172	0.156356	1	4366	tags=42%, list=23%, signal=54%
GO_REGULATION_OF_RESPONSE_TO_DNA_DAMAGE_STIMULUS	GO_REGULATION_OF_RESPONSE_TO_DNA_DAMAGE_STIMULUS		207	0.359378	1.45984	0	0.157083	1	3812	tags=32%, list=20%, signal=39%
GO_POSITIVE_REGULATION_OF_GENE_EXPRESSION_EPIGENETIC	GO_POSITIVE_REGULATION_OF_GENE_EXPRESSION_EPIGENETIC		60	0.427573	1.45905	0.0152505	0.157573	1	5047	tags=40%, list=26%, signal=54%
GO_POSITIVE_REGULATION_OF_DENDRITIC_SPINE_MORPHOGENESIS	GO_POSITIVE_REGULATION_OF_DENDRITIC_SPINE_MORPHOGENESIS		18	0.556112	1.45721	0.0496894	0.158093	1	2921	tags=39%, list=15%, signal=46%
GO_INTERLEUKIN_6_SECRETION	GO_INTERLEUKIN_6_SECRETION		38	0.468865	1.45672	0.0288248	0.158213	1	1541	tags=26%, list=8%, signal=29%
GO_IMMUNOGLOBULIN_PRODUCTION	GO_IMMUNOGLOBULIN_PRODUCTION		98	0.396796	1.45779	0.00884956	0.158223	1	4112	tags=39%, list=21%, signal=49%
GO_NEGATIVE_REGULATION_OF_INTERLEUKIN_2_PRODUCTION	GO_NEGATIVE_REGULATION_OF_INTERLEUKIN_2_PRODUCTION		23	0.536207	1.45745	0.0458333	0.158236	1	2698	tags=48%, list=14%, signal=55%
GO_NEGATIVE_REGULATION_OF_LEUKOCYTE_CELL_CELL_ADHESION	GO_NEGATIVE_REGULATION_OF_LEUKOCYTE_CELL_CELL_ADHESION		116	0.383953	1.45791	0.00867679	0.158519	1	3864	tags=38%, list=20%, signal=47%
GO_INTERLEUKIN_2_BIOSYNTHETIC_PROCESS	GO_INTERLEUKIN_2_BIOSYNTHETIC_PROCESS		22	0.535761	1.45533	0.0464646	0.158935	1	3828	tags=59%, list=20%, signal=74%
GO_NEUTRAL_AMINO_ACID_TRANSPORT	GO_NEUTRAL_AMINO_ACID_TRANSPORT		38	0.470475	1.45533	0.0295276	0.159354	1	3555	tags=37%, list=18%, signal=45%
GO_REGULATION_OF_GLIAL_CELL_PROLIFERATION	GO_REGULATION_OF_GLIAL_CELL_PROLIFERATION		31	0.48381	1.4535	0.0459082	0.160151	1	1256	tags=26%, list=6%, signal=28%
GO_POSITIVE_REGULATION_OF_CELL_CELL_ADHESION	GO_POSITIVE_REGULATION_OF_CELL_CELL_ADHESION		244	0.349713	1.45219	0.00232558	0.160851	1	3054	tags=31%, list=16%, signal=37%
GO_CELL_PROLIFERATION_IN_FOREBRAIN	GO_CELL_PROLIFERATION_IN_FOREBRAIN		26	0.504103	1.45226	0.0484211	0.16119	1	1638	tags=27%, list=8%, signal=29%
GO_RNA_PHOSPHODIESTER_BOND_HYDROLYSIS_ENDONUCLEOLYTIC	GO_RNA_PHOSPHODIESTER_BOND_HYDROLYSIS_ENDONUCLEOLYTIC		72	0.411852	1.44927	0.0131579	0.162499	1	4639	tags=42%, list=24%, signal=55%
GO_REGULATION_OF_NEUROINFLAMMATORY_RESPONSE	GO_REGULATION_OF_NEUROINFLAMMATORY_RESPONSE		31	0.493676	1.44822	0.0398323	0.163351	1	2731	tags=45%, list=14%, signal=52%
GO_POSITIVE_REGULATION_OF_CELL_KILLING	GO_POSITIVE_REGULATION_OF_CELL_KILLING		58	0.428257	1.44737	0.0330578	0.1639	1	3098	tags=33%, list=16%, signal=39%
GO_MODIFIED_AMINO_ACID_TRANSPORT	GO_MODIFIED_AMINO_ACID_TRANSPORT		23	0.511673	1.44702	0.049676	0.163954	1	3287	tags=52%, list=17%, signal=63%
GO_ORGAN_OR_TISSUE_SPECIFIC_IMMUNE_RESPONSE	GO_ORGAN_OR_TISSUE_SPECIFIC_IMMUNE_RESPONSE		39	0.465741	1.44609	0.048	0.164579	1	1790	tags=21%, list=9%, signal=23%
GO_LEUKOCYTE_MIGRATION	GO_LEUKOCYTE_MIGRATION		420	0.328897	1.44477	0.00245098	0.165741	1	2562	tags=26%, list=13%, signal=30%
GO_HISTONE_H3_K9_MODIFICATION	GO_HISTONE_H3_K9_MODIFICATION		46	0.446636	1.44361	0.0442105	0.166244	1	2125	tags=24%, list=11%, signal=27%
GO_RNA_3_END_PROCESSING	GO_RNA_3_END_PROCESSING		147	0.368512	1.44379	0.0091954	0.166463	1	5386	tags=37%, list=28%, signal=50%
GO_ANTIBACTERIAL_HUMORAL_RESPONSE	GO_ANTIBACTERIAL_HUMORAL_RESPONSE		41	0.456116	1.44233	0.0427699	0.166986	1	2279	tags=24%, list=12%, signal=28%
GO_MITOTIC_DNA_INTEGRITY_CHECKPOINT	GO_MITOTIC_DNA_INTEGRITY_CHECKPOINT		105	0.385673	1.44181	0.0152174	0.167154	1	1307	tags=23%, list=7%, signal=24%
GO_REGULATION_OF_NATURAL_KILLER_CELL_MEDIATED_IMMUNITY	GO_REGULATION_OF_NATURAL_KILLER_CELL_MEDIATED_IMMUNITY		43	0.451854	1.44109	0.0313152	0.167183	1	3780	tags=37%, list=20%, signal=46%
GO_REGULATION_OF_CD4_POSITIVE_ALPHA_BETA_T_CELL_DIFFERENTIATION	GO_REGULATION_OF_CD4_POSITIVE_ALPHA_BETA_T_CELL_DIFFERENTIATION		46	0.440342	1.44237	0.0294118	0.167364	1	3880	tags=43%, list=20%, signal=54%
GO_POSITIVE_REGULATION_OF_INTERLEUKIN_6_PRODUCTION	GO_POSITIVE_REGULATION_OF_INTERLEUKIN_6_PRODUCTION		85	0.397992	1.43932	0.0204082	0.16802	1	3996	tags=40%, list=21%, signal=50%
GO_VASCULAR_ENDOTHELIAL_GROWTH_FACTOR_PRODUCTION	GO_VASCULAR_ENDOTHELIAL_GROWTH_FACTOR_PRODUCTION		33	0.472561	1.44	0.0391304	0.168067	1	4024	tags=45%, list=21%, signal=57%
GO_NATURAL_KILLER_CELL_ACTIVATION	GO_NATURAL_KILLER_CELL_ACTIVATION		83	0.400175	1.4376	0.0189873	0.168406	1	3496	tags=30%, list=18%, signal=37%
GO_MACROPHAGE_ACTIVATION	GO_MACROPHAGE_ACTIVATION		84	0.390869	1.43773	0.00884956	0.168659	1	2850	tags=32%, list=15%, signal=38%
GO_REGULATION_OF_POSTTRANSCRIPTIONAL_GENE_SILENCING	GO_REGULATION_OF_POSTTRANSCRIPTIONAL_GENE_SILENCING		111	0.381442	1.43435	0.0087146	0.171425	1	5170	tags=39%, list=27%, signal=53%
GO_REGULATION_OF_CELL_DIVISION	GO_REGULATION_OF_CELL_DIVISION		165	0.364881	1.43257	0.00456621	0.172778	1	2149	tags=21%, list=11%, signal=24%
GO_CELLULAR_TRANSITION_METAL_ION_HOMEOSTASIS	GO_CELLULAR_TRANSITION_METAL_ION_HOMEOSTASIS		108	0.383307	1.43039	0.0170576	0.173379	1	1927	tags=20%, list=10%, signal=22%
GO_POSITIVE_REGULATION_OF_CELL_CYCLE_G1_S_PHASE_TRANSITION	GO_POSITIVE_REGULATION_OF_CELL_CYCLE_G1_S_PHASE_TRANSITION		46	0.436829	1.42884	0.0348361	0.173546	1	1746	tags=28%, list=9%, signal=31%
GO_REGULATION_OF_DEFENSE_RESPONSE_TO_VIRUS	GO_REGULATION_OF_DEFENSE_RESPONSE_TO_VIRUS		71	0.405172	1.42827	0.0285088	0.17379	1	2101	tags=23%, list=11%, signal=25%
GO_RNA_EXPORT_FROM_NUCLEUS	GO_RNA_EXPORT_FROM_NUCLEUS		137	0.370256	1.43039	0.0127932	0.173804	1	6071	tags=45%, list=31%, signal=65%
GO_REGULATION_OF_PROTEIN_MATURATION	GO_REGULATION_OF_PROTEIN_MATURATION		64	0.409688	1.42753	0.0311111	0.173853	1	2805	tags=28%, list=14%, signal=33%
GO_HETEROPHILIC_CELL_CELL_ADHESION_VIA_PLASMA_MEMBRANE_CELL_ADHESION_MOLECULES	GO_HETEROPHILIC_CELL_CELL_ADHESION_VIA_PLASMA_MEMBRANE_CELL_ADHESION_MOLECULES		46	0.441567	1.43065	0.0294118	0.173909	1	2248	tags=28%, list=12%, signal=32%
GO_REGULATION_OF_RESPONSE_TO_CYTOKINE_STIMULUS	GO_REGULATION_OF_RESPONSE_TO_CYTOKINE_STIMULUS		165	0.359476	1.42953	0.0116009	0.173951	1	3168	tags=28%, list=16%, signal=34%
GO_NEGATIVE_REGULATION_OF_TYPE_I_INTERFERON_PRODUCTION	GO_NEGATIVE_REGULATION_OF_TYPE_I_INTERFERON_PRODUCTION		44	0.448326	1.42681	0.0377359	0.174336	1	3103	tags=34%, list=16%, signal=41%
GO_NEGATIVE_REGULATION_OF_RESPONSE_TO_DNA_DAMAGE_STIMULUS	GO_NEGATIVE_REGULATION_OF_RESPONSE_TO_DNA_DAMAGE_STIMULUS		80	0.401014	1.42412	0.0127119	0.174715	1	1948	tags=25%, list=10%, signal=28%
GO_VIRAL_GENOME_REPLICATION	GO_VIRAL_GENOME_REPLICATION		119	0.372932	1.42462	0.00659341	0.174969	1	4708	tags=36%, list=24%, signal=47%
GO_B_CELL_MEDIATED_IMMUNITY	GO_B_CELL_MEDIATED_IMMUNITY		113	0.377466	1.42465	0.00645161	0.175333	1	2850	tags=31%, list=15%, signal=36%
GO_NATURAL_KILLER_CELL_ACTIVATION_INVOLVED_IN_IMMUNE_RESPONSE	GO_NATURAL_KILLER_CELL_ACTIVATION_INVOLVED_IN_IMMUNE_RESPONSE		31	0.471378	1.42495	0.0491453	0.17541	1	5662	tags=35%, list=29%, signal=50%
GO_POSITIVE_REGULATION_OF_DNA_BIOSYNTHETIC_PROCESS	GO_POSITIVE_REGULATION_OF_DNA_BIOSYNTHETIC_PROCESS		66	0.406921	1.42235	0.0255319	0.176493	1	4813	tags=44%, list=25%, signal=58%
GO_MICROTUBULE_POLYMERIZATION_OR_DEPOLYMERIZATION	GO_MICROTUBULE_POLYMERIZATION_OR_DEPOLYMERIZATION		109	0.377824	1.42039	0.0196507	0.17717	1	3896	tags=36%, list=20%, signal=45%
GO_LYMPHOCYTE_COSTIMULATION	GO_LYMPHOCYTE_COSTIMULATION		55	0.428216	1.42091	0.041841	0.177393	1	3828	tags=42%, list=20%, signal=52%
GO_POSITIVE_REGULATION_OF_PRODUCTION_OF_MOLECULAR_MEDIATOR_OF_IMMUNE_RESPONSE	GO_POSITIVE_REGULATION_OF_PRODUCTION_OF_MOLECULAR_MEDIATOR_OF_IMMUNE_RESPONSE		93	0.386882	1.42122	0.0229645	0.177419	1	3893	tags=38%, list=20%, signal=47%
GO_NATURAL_KILLER_CELL_MEDIATED_IMMUNITY	GO_NATURAL_KILLER_CELL_MEDIATED_IMMUNITY		61	0.418068	1.42042	0.0313152	0.17753	1	5772	tags=56%, list=30%, signal=79%
GO_POSITIVE_REGULATION_OF_CYTOKINE_SECRETION	GO_POSITIVE_REGULATION_OF_CYTOKINE_SECRETION		128	0.367328	1.41787	0.0148936	0.177897	1	3677	tags=34%, list=19%, signal=42%
GO_TRANSITION_METAL_ION_HOMEOSTASIS	GO_TRANSITION_METAL_ION_HOMEOSTASIS		135	0.359006	1.41708	0.010661	0.17847	1	1927	tags=19%, list=10%, signal=20%
GO_RNA_LOCALIZATION	GO_RNA_LOCALIZATION		227	0.342471	1.41417	0	0.181045	1	5052	tags=35%, list=26%, signal=47%
GO_NEGATIVE_REGULATION_OF_LYMPHOCYTE_ACTIVATION	GO_NEGATIVE_REGULATION_OF_LYMPHOCYTE_ACTIVATION		138	0.362186	1.41	0.0195228	0.184927	1	3203	tags=36%, list=17%, signal=42%
GO_PROTEIN_K11_LINKED_UBIQUITINATION	GO_PROTEIN_K11_LINKED_UBIQUITINATION		30	0.477884	1.40895	0.0451745	0.1855	1	1389	tags=17%, list=7%, signal=18%
GO_NEGATIVE_REGULATION_OF_LEUKOCYTE_PROLIFERATION	GO_NEGATIVE_REGULATION_OF_LEUKOCYTE_PROLIFERATION		77	0.399593	1.40747	0.0301075	0.185743	1	2279	tags=35%, list=12%, signal=40%
GO_RESPONSE_TO_MOLECULE_OF_BACTERIAL_ORIGIN	GO_RESPONSE_TO_MOLECULE_OF_BACTERIAL_ORIGIN		333	0.32679	1.40761	0	0.185983	1	3502	tags=29%, list=18%, signal=34%
GO_POSITIVE_REGULATION_OF_RESPONSE_TO_BIOTIC_STIMULUS	GO_POSITIVE_REGULATION_OF_RESPONSE_TO_BIOTIC_STIMULUS		44	0.436774	1.40627	0.0436681	0.186066	1	5589	tags=48%, list=29%, signal=67%
GO_NEGATIVE_REGULATION_OF_INNATE_IMMUNE_RESPONSE	GO_NEGATIVE_REGULATION_OF_INNATE_IMMUNE_RESPONSE		49	0.429038	1.40531	0.0371991	0.186126	1	3168	tags=37%, list=16%, signal=44%
GO_INTERACTION_WITH_SYMBIONT	GO_INTERACTION_WITH_SYMBIONT		76	0.395876	1.40236	0.0248963	0.189444	1	3486	tags=29%, list=18%, signal=35%
GO_INTERLEUKIN_6_PRODUCTION	GO_INTERLEUKIN_6_PRODUCTION		136	0.360961	1.4018	0.0127389	0.189774	1	2445	tags=27%, list=13%, signal=31%
GO_NEGATIVE_REGULATION_OF_DNA_RECOMBINATION	GO_NEGATIVE_REGULATION_OF_DNA_RECOMBINATION		43	0.435525	1.4009	0.0473373	0.190148	1	4726	tags=51%, list=24%, signal=68%
GO_REGULATION_OF_CELL_CYCLE_G1_S_PHASE_TRANSITION	GO_REGULATION_OF_CELL_CYCLE_G1_S_PHASE_TRANSITION		160	0.35134	1.40115	0.0043384	0.190244	1	1948	tags=21%, list=10%, signal=23%
GO_NUCLEIC_ACID_PHOSPHODIESTER_BOND_HYDROLYSIS	GO_NUCLEIC_ACID_PHOSPHODIESTER_BOND_HYDROLYSIS		285	0.328968	1.39797	0	0.19282	1	4710	tags=35%, list=24%, signal=46%
GO_PATTERN_RECOGNITION_RECEPTOR_SIGNALING_PATHWAY	GO_PATTERN_RECOGNITION_RECEPTOR_SIGNALING_PATHWAY		191	0.347681	1.39704	0.0104603	0.193206	1	4466	tags=36%, list=23%, signal=46%
GO_ANTIGEN_PROCESSING_AND_PRESENTATION_OF_PEPTIDE_ANTIGEN_VIA_MHC_CLASS_I	GO_ANTIGEN_PROCESSING_AND_PRESENTATION_OF_PEPTIDE_ANTIGEN_VIA_MHC_CLASS_I		88	0.385439	1.39705	0.0263158	0.193613	1	5876	tags=56%, list=30%, signal=80%
GO_POSITIVE_REGULATION_OF_NEURON_DEATH	GO_POSITIVE_REGULATION_OF_NEURON_DEATH		87	0.381401	1.39561	0.0211416	0.194769	1	4662	tags=40%, list=24%, signal=53%
GO_REGULATION_OF_INFLAMMATORY_RESPONSE	GO_REGULATION_OF_INFLAMMATORY_RESPONSE		320	0.326958	1.39507	0	0.195061	1	3203	tags=29%, list=17%, signal=34%
GO_CELL_ADHESION_MEDIATED_BY_INTEGRIN	GO_CELL_ADHESION_MEDIATED_BY_INTEGRIN		68	0.402878	1.3935	0.041841	0.196237	1	2358	tags=29%, list=12%, signal=33%
GO_GENE_SILENCING_BY_RNA	GO_GENE_SILENCING_BY_RNA		176	0.344299	1.39043	0.0175055	0.198679	1	5718	tags=42%, list=30%, signal=59%
GO_BASE_EXCISION_REPAIR	GO_BASE_EXCISION_REPAIR		41	0.448663	1.39099	0.046748	0.198732	1	3860	tags=41%, list=20%, signal=52%
GO_TOLL_LIKE_RECEPTOR_SIGNALING_PATHWAY	GO_TOLL_LIKE_RECEPTOR_SIGNALING_PATHWAY		140	0.352347	1.39062	0.0133929	0.19887	1	4466	tags=36%, list=23%, signal=46%
GO_NEGATIVE_REGULATION_OF_CYTOKINE_PRODUCTION	GO_NEGATIVE_REGULATION_OF_CYTOKINE_PRODUCTION		257	0.329827	1.38833	0.00722892	0.201032	1	2450	tags=26%, list=13%, signal=29%
GO_CELL_CHEMOTAXIS	GO_CELL_CHEMOTAXIS		289	0.327965	1.38794	0.00445434	0.20114	1	2382	tags=25%, list=12%, signal=28%
GO_CELLULAR_AMINO_ACID_BIOSYNTHETIC_PROCESS	GO_CELLULAR_AMINO_ACID_BIOSYNTHETIC_PROCESS		64	0.398793	1.38634	0.0473251	0.202826	1	3400	tags=33%, list=18%, signal=40%
GO_REGULATION_OF_CELL_CELL_ADHESION	GO_REGULATION_OF_CELL_CELL_ADHESION		379	0.318687	1.38329	0.00248139	0.20617	1	3880	tags=34%, list=20%, signal=41%
GO_VIRAL_LIFE_CYCLE	GO_VIRAL_LIFE_CYCLE		319	0.324192	1.38132	0.00246914	0.208117	1	3486	tags=27%, list=18%, signal=33%
GO_SKIN_DEVELOPMENT	GO_SKIN_DEVELOPMENT		328	0.320358	1.37909	0.00240385	0.209842	1	1593	tags=17%, list=8%, signal=19%
GO_NEURON_MIGRATION	GO_NEURON_MIGRATION		152	0.349545	1.37808	0.0163934	0.2108	1	3335	tags=30%, list=17%, signal=35%
GO_EXTRACELLULAR_MATRIX_DISASSEMBLY	GO_EXTRACELLULAR_MATRIX_DISASSEMBLY		79	0.383706	1.3755	0.0364465	0.213123	1	1275	tags=20%, list=7%, signal=22%
GO_LEUKOCYTE_MEDIATED_CYTOTOXICITY	GO_LEUKOCYTE_MEDIATED_CYTOTOXICITY		100	0.368816	1.36855	0.0343348	0.220662	1	3098	tags=31%, list=16%, signal=37%
GO_NEGATIVE_REGULATION_OF_CELL_CELL_ADHESION	GO_NEGATIVE_REGULATION_OF_CELL_CELL_ADHESION		164	0.34284	1.36677	0.0223714	0.221938	1	3203	tags=30%, list=17%, signal=36%
GO_PEPTIDE_CROSS_LINKING	GO_PEPTIDE_CROSS_LINKING		60	0.401184	1.36521	0.0460526	0.223259	1	1291	tags=20%, list=7%, signal=21%
GO_REGULATION_OF_B_CELL_MEDIATED_IMMUNITY	GO_REGULATION_OF_B_CELL_MEDIATED_IMMUNITY		53	0.412575	1.36464	0.0482456	0.223652	1	2850	tags=34%, list=15%, signal=40%
GO_GERM_CELL_DEVELOPMENT	GO_GERM_CELL_DEVELOPMENT		247	0.328569	1.36124	0.002331	0.226898	1	3026	tags=22%, list=16%, signal=26%
GO_LYMPHOCYTE_MIGRATION	GO_LYMPHOCYTE_MIGRATION		103	0.370413	1.35917	0.0170576	0.229453	1	2186	tags=27%, list=11%, signal=30%
GO_PROTEIN_FOLDING	GO_PROTEIN_FOLDING		215	0.330869	1.35844	0.0115207	0.229645	1	4710	tags=37%, list=24%, signal=48%
GO_TRNA_METABOLIC_PROCESS	GO_TRNA_METABOLIC_PROCESS		175	0.338923	1.35597	0.0135747	0.232169	1	4362	tags=31%, list=23%, signal=39%
GO_RNA_PHOSPHODIESTER_BOND_HYDROLYSIS	GO_RNA_PHOSPHODIESTER_BOND_HYDROLYSIS		144	0.343643	1.35476	0.0206422	0.232649	1	4639	tags=35%, list=24%, signal=45%
GO_INTERLEUKIN_1_PRODUCTION	GO_INTERLEUKIN_1_PRODUCTION		92	0.364765	1.35441	0.0345572	0.232697	1	2200	tags=27%, list=11%, signal=31%
GO_MRNA_3_END_PROCESSING	GO_MRNA_3_END_PROCESSING		98	0.365862	1.35232	0.0313152	0.234098	1	5523	tags=40%, list=29%, signal=55%
GO_MICROTUBULE_BASED_MOVEMENT	GO_MICROTUBULE_BASED_MOVEMENT		273	0.323083	1.35197	0.0113122	0.234232	1	3882	tags=27%, list=20%, signal=33%
GO_MODIFICATION_OF_MORPHOLOGY_OR_PHYSIOLOGY_OF_OTHER_ORGANISM_INVOLVED_IN_SYMBIOTIC_INTERACTION	GO_MODIFICATION_OF_MORPHOLOGY_OR_PHYSIOLOGY_OF_OTHER_ORGANISM_INVOLVED_IN_SYMBIOTIC_INTERACTION		108	0.363706	1.35238	0.0426009	0.234436	1	3584	tags=30%, list=19%, signal=36%
GO_CELL_CYCLE_ARREST	GO_CELL_CYCLE_ARREST		238	0.319894	1.3479	0.00225734	0.237521	1	3894	tags=31%, list=20%, signal=38%
GO_EPIDERMAL_CELL_DIFFERENTIATION	GO_EPIDERMAL_CELL_DIFFERENTIATION		266	0.317943	1.34801	0	0.237815	1	1291	tags=15%, list=7%, signal=16%
GO_REGULATION_OF_VIRAL_GENOME_REPLICATION	GO_REGULATION_OF_VIRAL_GENOME_REPLICATION		92	0.365165	1.34816	0.0331126	0.238035	1	4931	tags=38%, list=25%, signal=51%
GO_POSITIVE_REGULATION_OF_NUCLEOBASE_CONTAINING_COMPOUND_METABOLIC_PROCESS	GO_POSITIVE_REGULATION_OF_NUCLEOBASE_CONTAINING_COMPOUND_METABOLIC_PROCESS		229	0.32437	1.34676	0.0119332	0.238875	1	5405	tags=42%, list=28%, signal=58%
GO_REGULATION_OF_SIGNAL_TRANSDUCTION_BY_P53_CLASS_MEDIATOR	GO_REGULATION_OF_SIGNAL_TRANSDUCTION_BY_P53_CLASS_MEDIATOR		178	0.335684	1.34559	0.00900901	0.239858	1	3873	tags=31%, list=20%, signal=39%
GO_REGULATION_OF_T_CELL_DIFFERENTIATION	GO_REGULATION_OF_T_CELL_DIFFERENTIATION		133	0.352293	1.34504	0.0385439	0.240225	1	3880	tags=35%, list=20%, signal=43%
GO_PRODUCTION_OF_MOLECULAR_MEDIATOR_OF_IMMUNE_RESPONSE	GO_PRODUCTION_OF_MOLECULAR_MEDIATOR_OF_IMMUNE_RESPONSE		187	0.329682	1.34249	0.020595	0.243451	1	4479	tags=39%, list=23%, signal=50%
GO_REGULATION_OF_LYMPHOCYTE_DIFFERENTIATION	GO_REGULATION_OF_LYMPHOCYTE_DIFFERENTIATION		162	0.335885	1.33994	0.0150215	0.245678	1	3880	tags=33%, list=20%, signal=41%
GO_REGULATION_OF_PHAGOCYTOSIS	GO_REGULATION_OF_PHAGOCYTOSIS		88	0.367075	1.33956	0.0306346	0.245818	1	2785	tags=31%, list=14%, signal=36%
GO_COMPLEMENT_ACTIVATION	GO_COMPLEMENT_ACTIVATION		67	0.384099	1.32673	0.0489362	0.256421	1	2531	tags=28%, list=13%, signal=33%
GO_ESTABLISHMENT_OF_RNA_LOCALIZATION	GO_ESTABLISHMENT_OF_RNA_LOCALIZATION		194	0.324366	1.32028	0.0127932	0.26336	1	6071	tags=41%, list=31%, signal=59%
GO_LEUKOCYTE_APOPTOTIC_PROCESS	GO_LEUKOCYTE_APOPTOTIC_PROCESS		105	0.349591	1.31812	0.0475113	0.265103	1	2146	tags=22%, list=11%, signal=25%
GO_NCRNA_METABOLIC_PROCESS	GO_NCRNA_METABOLIC_PROCESS		449	0.296509	1.31482	0.00471698	0.267977	1	5360	tags=35%, list=28%, signal=48%
GO_NEGATIVE_REGULATION_OF_VIRAL_PROCESS	GO_NEGATIVE_REGULATION_OF_VIRAL_PROCESS		94	0.356683	1.31275	0.0427928	0.269719	1	2973	tags=24%, list=15%, signal=29%
GO_NEGATIVE_REGULATION_OF_IMMUNE_RESPONSE	GO_NEGATIVE_REGULATION_OF_IMMUNE_RESPONSE		136	0.336329	1.31147	0.016129	0.27088	1	3168	tags=33%, list=16%, signal=39%
GO_REGULATION_OF_ESTABLISHMENT_OF_PLANAR_POLARITY	GO_REGULATION_OF_ESTABLISHMENT_OF_PLANAR_POLARITY		109	0.34744	1.30769	0.0371179	0.272603	1	5318	tags=44%, list=27%, signal=60%
GO_REGULATION_OF_MULTI_ORGANISM_PROCESS	GO_REGULATION_OF_MULTI_ORGANISM_PROCESS		395	0.300552	1.30674	0.0078329	0.272762	1	2991	tags=21%, list=15%, signal=25%
GO_POSITIVE_REGULATION_OF_CELL_ADHESION	GO_POSITIVE_REGULATION_OF_CELL_ADHESION		389	0.29759	1.30586	0.0163551	0.273299	1	3100	tags=27%, list=16%, signal=31%
GO_REGULATION_OF_CHROMATIN_ORGANIZATION	GO_REGULATION_OF_CHROMATIN_ORGANIZATION		178	0.320688	1.30191	0.018648	0.278367	1	2736	tags=18%, list=14%, signal=21%
GO_SIGNAL_TRANSDUCTION_IN_RESPONSE_TO_DNA_DAMAGE	GO_SIGNAL_TRANSDUCTION_IN_RESPONSE_TO_DNA_DAMAGE		130	0.333357	1.29859	0.0353982	0.282361	1	1948	tags=20%, list=10%, signal=22%
GO_TUMOR_NECROSIS_FACTOR_SUPERFAMILY_CYTOKINE_PRODUCTION	GO_TUMOR_NECROSIS_FACTOR_SUPERFAMILY_CYTOKINE_PRODUCTION		140	0.334666	1.29685	0.0419426	0.283587	1	4095	tags=36%, list=21%, signal=46%
GO_RESPONSE_TO_NUTRIENT	GO_RESPONSE_TO_NUTRIENT		215	0.315623	1.29504	0.0261283	0.283892	1	1546	tags=15%, list=8%, signal=16%
GO_MAINTENANCE_OF_LOCATION	GO_MAINTENANCE_OF_LOCATION		321	0.302301	1.29097	0.0222222	0.286367	1	3257	tags=26%, list=17%, signal=30%
GO_POSITIVE_REGULATION_OF_BINDING	GO_POSITIVE_REGULATION_OF_BINDING		181	0.318212	1.28491	0.0162413	0.294449	1	3816	tags=28%, list=20%, signal=35%
GO_NEGATIVE_REGULATION_OF_CELL_ACTIVATION	GO_NEGATIVE_REGULATION_OF_CELL_ACTIVATION		184	0.319628	1.28387	0.0352423	0.294947	1	2942	tags=31%, list=15%, signal=36%
GO_NEGATIVE_REGULATION_OF_ORGANELLE_ORGANIZATION	GO_NEGATIVE_REGULATION_OF_ORGANELLE_ORGANIZATION		369	0.295358	1.28224	0.00769231	0.296609	1	3261	tags=22%, list=17%, signal=27%
GO_REGULATION_OF_PROTEIN_MODIFICATION_BY_SMALL_PROTEIN_CONJUGATION_OR_REMOVAL	GO_REGULATION_OF_PROTEIN_MODIFICATION_BY_SMALL_PROTEIN_CONJUGATION_OR_REMOVAL		216	0.310723	1.27854	0.0307018	0.301069	1	4165	tags=28%, list=22%, signal=36%
GO_POSITIVE_REGULATION_OF_MULTI_ORGANISM_PROCESS	GO_POSITIVE_REGULATION_OF_MULTI_ORGANISM_PROCESS		181	0.319458	1.27553	0.0445434	0.303286	1	2780	tags=19%, list=14%, signal=22%
GO_NUCLEOBASE_CONTAINING_COMPOUND_TRANSPORT	GO_NUCLEOBASE_CONTAINING_COMPOUND_TRANSPORT		237	0.305992	1.2733	0.0343249	0.304819	1	5052	tags=33%, list=26%, signal=45%
GO_T_CELL_DIFFERENTIATION	GO_T_CELL_DIFFERENTIATION		229	0.306854	1.26879	0.0249433	0.3081	1	4443	tags=36%, list=23%, signal=46%
GO_NEGATIVE_REGULATION_OF_DEFENSE_RESPONSE	GO_NEGATIVE_REGULATION_OF_DEFENSE_RESPONSE		191	0.309528	1.26779	0.0437788	0.30945	1	3168	tags=27%, list=16%, signal=32%
GO_REGULATION_OF_ORGANELLE_ASSEMBLY	GO_REGULATION_OF_ORGANELLE_ASSEMBLY		186	0.314033	1.26694	0.0412148	0.310561	1	2765	tags=21%, list=14%, signal=24%
GO_CILIUM_ORGANIZATION	GO_CILIUM_ORGANIZATION		369	0.290436	1.26411	0.0046083	0.314457	1	3436	tags=25%, list=18%, signal=30%
GO_REGULATION_OF_LEUKOCYTE_MIGRATION	GO_REGULATION_OF_LEUKOCYTE_MIGRATION		182	0.311473	1.26143	0.0357895	0.317698	1	2365	tags=26%, list=12%, signal=29%
GO_PALLIUM_DEVELOPMENT	GO_PALLIUM_DEVELOPMENT		168	0.314668	1.25709	0.0400891	0.32217	1	3170	tags=24%, list=16%, signal=29%
GO_TELENCEPHALON_DEVELOPMENT	GO_TELENCEPHALON_DEVELOPMENT		247	0.298599	1.25333	0.0368664	0.326667	1	2969	tags=25%, list=15%, signal=29%
GO_MACROMOLECULE_METHYLATION	GO_MACROMOLECULE_METHYLATION		294	0.293783	1.25045	0.0342298	0.329405	1	5434	tags=35%, list=28%, signal=48%
GO_REGULATION_OF_SYMBIOSIS_ENCOMPASSING_MUTUALISM_THROUGH_PARASITISM	GO_REGULATION_OF_SYMBIOSIS_ENCOMPASSING_MUTUALISM_THROUGH_PARASITISM		223	0.301093	1.24897	0.0425056	0.33089	1	3499	tags=24%, list=18%, signal=29%
GO_REGULATION_OF_LEUKOCYTE_DIFFERENTIATION	GO_REGULATION_OF_LEUKOCYTE_DIFFERENTIATION		262	0.292843	1.22989	0.0464037	0.350691	1	3894	tags=33%, list=20%, signal=41%
GO_POSITIVE_REGULATION_OF_RESPONSE_TO_EXTERNAL_STIMULUS	GO_POSITIVE_REGULATION_OF_RESPONSE_TO_EXTERNAL_STIMULUS		297	0.288174	1.22595	0.0351759	0.356148	1	2731	tags=23%, list=14%, signal=27%
GO_EPIDERMIS_DEVELOPMENT	GO_EPIDERMIS_DEVELOPMENT		374	0.280098	1.21914	0.0168675	0.364411	1	1291	tags=14%, list=7%, signal=15%
GO_RESPONSE_TO_RADIATION	GO_RESPONSE_TO_RADIATION		442	0.276165	1.21649	0.0119904	0.366952	1	2137	tags=16%, list=11%, signal=17%
GO_CELLULAR_RESPONSE_TO_DRUG	GO_CELLULAR_RESPONSE_TO_DRUG		349	0.280615	1.20914	0.0408654	0.371209	1	2094	tags=19%, list=11%, signal=21%
GO_LYMPHOCYTE_DIFFERENTIATION	GO_LYMPHOCYTE_DIFFERENTIATION		340	0.282012	1.20302	0.0390805	0.379285	1	4657	tags=36%, list=24%, signal=46%
GO_REGULATION_OF_PEPTIDE_SECRETION	GO_REGULATION_OF_PEPTIDE_SECRETION		463	0.269136	1.19153	0.0362319	0.393153	1	2200	tags=19%, list=11%, signal=21%
GO_POSITIVE_REGULATION_OF_SECRETION	GO_POSITIVE_REGULATION_OF_SECRETION		405	0.272636	1.19001	0.0489511	0.394512	1	3678	tags=27%, list=19%, signal=32%
GO_LEUKOCYTE_DIFFERENTIATION	GO_LEUKOCYTE_DIFFERENTIATION		496	0.268914	1.1889	0.03	0.396454	1	4464	tags=35%, list=23%, signal=44%
GO_NEURON_DEATH	GO_NEURON_DEATH		336	0.274167	1.18501	0.0487239	0.400606	1	3716	tags=28%, list=19%, signal=34%
GO_ANATOMICAL_STRUCTURE_HOMEOSTASIS	GO_ANATOMICAL_STRUCTURE_HOMEOSTASIS		424	0.269538	1.17787	0.0496614	0.411641	1	2506	tags=20%, list=13%, signal=22%
