# Supplementary material for: A TP53-based immune prognostic model for muscle-invasive bladder cancer
Source: Aging (Albany NY). 2020 Dec 15;13(2):1929–46. doi: 10.18632/aging.202150 (PMC7880361; doi:10.18632/aging.202150)
Supplement: Supplementary Table 5 [file aging-13-202150-s003.xlsx]

## Sheet: S5
Supplementary Table 5. Functional enrichment analysis of the twenty-five immune genes identified.
ID	Description	GeneRatio	BgRatio	pvalue	p.adjust	qvalue	geneID	Count
GO:0006959	humoral immune response	21/44	276/17913	5.96498e-27	9.01904e-24	5.89591e-24	10584/3848/25818/55600/7124/2208/2147/5645/1991/1511/5266/140683/26525/57115/57829/722/931/1380/730249/354/6407	21
GO:0019730	antimicrobial humoral response	13/44	106/17913	2.27462e-19	1.71961e-16	1.12414e-16	25818/55600/2147/5645/1991/1511/5266/140683/26525/57115/730249/354/6407	13
GO:0045089	positive regulation of innate immune response	14/44	373/17913	1.47559e-13	7.12121e-11	4.65526e-11	140453/4584/56667/89870/4583/118430/4588/394263/5063/285852/3929/57115/56832/730249	14
GO:0002758	innate immune response-activating signal transduction	13/44	298/17913	1.88392e-13	7.12121e-11	4.65526e-11	140453/4584/56667/89870/4583/118430/4588/394263/5063/285852/3929/57115/730249	13
GO:0016266	O-glycan processing	7/44	60/17913	1.1464e-10	1.92595e-08	1.25903e-08	140453/4584/56667/4583/118430/4588/394263	7
GO:0002922	positive regulation of humoral immune response	5/44	19/17913	8.01449e-10	1.00983e-07	6.60141e-08	25818/7124/2208/57829/730249	5
GO:0044130	negative regulation of growth of symbiont in host	4/44	13/17913	2.22712e-08	1.98082e-06	1.2949e-06	7124/1991/1511/3929	4
GO:0044117	growth of symbiont in host	4/44	16/17913	5.6387e-08	3.87532e-06	2.53337e-06	7124/1991/1511/3929	4
GO:0002697	regulation of immune effector process	10/44	441/17913	8.66665e-08	5.03999e-06	3.29473e-06	3598/25818/7124/89870/2208/2147/3929/722/1380/3558	10
GO:0016064	immunoglobulin mediated immune response	7/44	171/17913	1.81805e-07	1.00878e-05	6.5946e-06	3635/3598/7124/2208/722/1380/3558	7
GO:0050727	regulation of inflammatory response	10/44	479/17913	1.86812e-07	1.00878e-05	6.5946e-06	3848/7124/2147/1991/3929/722/9370/1380/730249/3558	10
GO:0061844	antimicrobial humoral immune response mediated by antimicrobial peptide	5/44	55/17913	2.24595e-07	1.13196e-05	7.39981e-06	25818/2147/1991/57115/354	5
GO:0031640	killing of cells of other organism	5/44	60/17913	3.49417e-07	1.60097e-05	1.04658e-05	2208/2147/1991/1511/57115	5
GO:0044364	disruption of cells of other organism	5/44	60/17913	3.49417e-07	1.60097e-05	1.04658e-05	2208/2147/1991/1511/57115	5
GO:0001818	negative regulation of cytokine production	8/44	290/17913	4.57982e-07	2.03667e-05	1.33141e-05	3635/7124/2147/1991/26525/3929/9370/730249	8
GO:0002449	lymphocyte mediated immunity	8/44	293/17913	4.95101e-07	2.07942e-05	1.35936e-05	3635/3598/7124/2208/722/1380/3558/100431172	8
GO:0032677	regulation of interleukin-8 production	5/44	72/17913	8.75858e-07	3.57918e-05	2.33977e-05	7124/1401/1991/3929/9370	5
GO:0043413	macromolecule glycosylation	7/44	228/17913	1.2672e-06	4.7243e-05	3.08836e-05	140453/4584/56667/4583/118430/4588/394263	7
GO:0050777	negative regulation of immune response	6/44	143/17913	1.28106e-06	4.7243e-05	3.08836e-05	3635/3598/7124/722/730249/3558	6
GO:0032637	interleukin-8 production	5/44	80/17913	1.48318e-06	5.33945e-05	3.49049e-05	7124/1401/1991/3929/9370	5
GO:0070942	neutrophil mediated cytotoxicity	3/44	10/17913	1.63944e-06	5.76474e-05	3.76851e-05	2147/1991/1511	3
GO:0001906	cell killing	6/44	156/17913	2.12765e-06	6.9935e-05	4.57178e-05	2208/2147/1991/1511/57115/100431172	6
GO:0002923	regulation of humoral immune response mediated by circulating immunoglobulin	3/44	11/17913	2.25037e-06	7.23948e-05	4.73257e-05	7124/2208/722	3
GO:0008228	opsonization	3/44	12/17913	2.99534e-06	9.24276e-05	6.04216e-05	1401/3929/722	3
GO:0051873	killing by host of symbiont cells	3/44	12/17913	2.99534e-06	9.24276e-05	6.04216e-05	2147/1991/1511	3
GO:0006953	acute-phase response	4/44	47/17913	5.22827e-06	0.000146392	9.56988e-05	7124/2147/1401/3929	4
GO:0002440	production of molecular mediator of immune response	6/44	191/17913	6.84631e-06	0.000184526	0.000120628	3598/25818/7124/1991/3558/354	6
GO:0009101	glycoprotein biosynthetic process	7/44	302/17913	8.10718e-06	0.000204301	0.000133555	140453/4584/56667/4583/118430/4588/394263	7
GO:0030277	maintenance of gastrointestinal epithelium	3/44	17/17913	9.17918e-06	0.000223854	0.000146337	56667/4583/4588	3
GO:0032103	positive regulation of response to external stimulus	7/44	315/17913	1.06656e-05	0.000255974	0.000167334	25818/7124/89870/2147/3929/730249/3558	7
GO:0006956	complement activation	5/44	128/17913	1.49606e-05	0.000353443	0.000231052	10584/3848/2147/722/1380	5
GO:0031348	negative regulation of defense response	6/44	237/17913	2.3337e-05	0.000534629	0.000349497	3848/2147/1991/9370/730249/3558	6
GO:0042100	B cell proliferation	4/44	71/17913	2.72861e-05	0.000615769	0.000402539	3635/931/1380/3558	4
GO:0072376	protein activation cascade	5/44	151/17913	3.31845e-05	0.00070669	0.000461975	10584/3848/2147/722/1380	5
GO:1902106	negative regulation of leukocyte differentiation	4/44	99/17913	0.000100562	0.00193972	0.00126803	3635/130733/9370/3558	4
GO:2000379	positive regulation of reactive oxygen species metabolic process	4/44	101/17913	0.000108684	0.00205412	0.00134282	7124/2147/1401/730249	4
GO:0019835	cytolysis	3/44	40/17913	0.000128209	0.00230776	0.00150862	2147/3929/57115	3
GO:1904659	glucose transmembrane transport	4/44	107/17913	0.000135909	0.00241758	0.00158042	55600/7124/9370/5473	4
GO:0042035	regulation of cytokine biosynthetic process	4/44	110/17913	0.000151231	0.00262829	0.00171816	3635/7124/1991/3929	4
GO:0008645	hexose transmembrane transport	4/44	112/17913	0.000162116	0.00278544	0.00182089	55600/7124/9370/5473	4
GO:0002521	leukocyte differentiation	7/44	485/17913	0.000164322	0.00279163	0.00182494	3635/7124/130733/9370/931/1380/3558	7
GO:1903039	positive regulation of leukocyte cell-cell adhesion	5/44	214/17913	0.00017262	0.00285236	0.00186464	7124/1991/5063/57829/3558	5
GO:0002694	regulation of leukocyte activation	7/44	492/17913	0.000179465	0.00289259	0.00189094	3635/3598/7124/5063/3929/57829/3558	7
GO:0032102	negative regulation of response to external stimulus	6/44	343/17913	0.000180269	0.00289259	0.00189094	3848/2147/1991/9370/730249/3558	6
GO:0002833	positive regulation of response to biotic stimulus	3/44	45/17913	0.000182567	0.00289259	0.00189094	25818/89870/730249	3
GO:0044764	multi-organism cellular process	3/44	47/17913	0.000207907	0.0031753	0.00207575	89870/2147/57115	3
GO:0042089	cytokine biosynthetic process	4/44	120/17913	0.000211382	0.0031961	0.00208935	3635/7124/1991/3929	4
GO:0007586	digestion	4/44	132/17913	0.000304344	0.00438256	0.00286495	56667/4583/5645/4588	4
GO:0045919	positive regulation of cytolysis	2/44	11/17913	0.000319786	0.00443594	0.00289985	3929/57115	2
GO:0032943	mononuclear cell proliferation	5/44	246/17913	0.00032898	0.00443972	0.00290233	3635/57829/931/1380/3558	5
GO:0031663	lipopolysaccharide-mediated signaling pathway	3/44	55/17913	0.000331805	0.00443972	0.00290233	7124/3929/730249	3
GO:0010745	negative regulation of macrophage derived foam cell differentiation	2/44	13/17913	0.000452101	0.00555753	0.00363305	1401/9370	2
GO:0002523	leukocyte migration involved in inflammatory response	2/44	14/17913	0.000526628	0.00585486	0.00382742	1991/3929	2
GO:1900006	positive regulation of dendrite development	3/44	69/17913	0.000646962	0.00688878	0.00450332	653/5063/3558	3
GO:0010888	negative regulation of lipid storage	2/44	18/17913	0.000879916	0.00869564	0.0056845	7124/1401	2
GO:0051023	regulation of immunoglobulin secretion	2/44	18/17913	0.000879916	0.00869564	0.0056845	7124/3558	2
GO:0098581	detection of external biotic stimulus	2/44	18/17913	0.000879916	0.00869564	0.0056845	3929/57115	2
GO:0022617	extracellular matrix disassembly	3/44	78/17913	0.000925044	0.00875519	0.00572342	5645/1991/1511	3
GO:0051702	interaction with symbiont	3/44	81/17913	0.00103214	0.00969316	0.00633659	2147/1991/1511	3
GO:0002685	regulation of leukocyte migration	4/44	186/17913	0.00110459	0.0101221	0.00661699	7124/653/1991/3929	4
GO:0046427	positive regulation of JAK-STAT cascade	3/44	85/17913	0.00118671	0.0107444	0.00702378	7124/2147/3558	3
GO:0007159	leukocyte cell-cell adhesion	5/44	328/17913	0.00120722	0.0108649	0.0071026	7124/1991/5063/57829/3558	5
GO:0048305	immunoglobulin secretion	2/44	22/17913	0.00132024	0.0114724	0.00749971	7124/3558	2
GO:0051000	positive regulation of nitric-oxide synthase activity	2/44	22/17913	0.00132024	0.0114724	0.00749971	7124/2208	2
GO:0050764	regulation of phagocytosis	3/44	90/17913	0.00139951	0.0120231	0.00785969	7124/722/9370	3
GO:1903531	negative regulation of secretion by cell	4/44	202/17913	0.00149737	0.0125084	0.00817695	3598/7124/26525/9370	4
GO:0032800	receptor biosynthetic process	2/44	24/17913	0.00157251	0.0128924	0.00842796	7124/9370	2
GO:0071216	cellular response to biotic stimulus	4/44	206/17913	0.00160901	0.0130097	0.00850469	7124/1511/3929/730249	4
GO:0042730	fibrinolysis	2/44	25/17913	0.00170659	0.0135809	0.00887805	3848/2147	2
GO:0046885	regulation of hormone biosynthetic process	2/44	27/17913	0.00199049	0.0153552	0.010038	7124/653	2
GO:0006874	cellular calcium ion homeostasis	5/44	375/17913	0.00217413	0.0165387	0.0108117	2147/130733/1991/931/3558	5
GO:0040013	negative regulation of locomotion	5/44	377/17913	0.00222498	0.0168208	0.0109961	89870/653/1991/9370/6407	5
GO:0055074	calcium ion homeostasis	5/44	388/17913	0.00252035	0.0185891	0.012152	2147/130733/1991/931/3558	5
GO:0070268	cornification	3/44	112/17913	0.00261513	0.0191945	0.0125478	3848/25818/5266	3
GO:0030449	regulation of complement activation	3/44	116/17913	0.00288841	0.0206004	0.0134668	2147/722/1380	3
GO:2000257	regulation of protein activation cascade	3/44	117/17913	0.00295938	0.0209092	0.0136687	2147/722/1380	3
GO:0045926	negative regulation of growth	4/44	244/17913	0.00297399	0.0209147	0.0136723	7124/1991/1511/3929	4
GO:0018149	peptide cross-linking	2/44	34/17913	0.00314689	0.0218261	0.0142681	3848/5266	2
GO:0060249	anatomical structure homeostasis	5/44	413/17913	0.00329678	0.0223531	0.0146126	3635/3848/56667/4583/4588	5
GO:0051291	protein heterooligomerization	3/44	128/17913	0.00381159	0.0250571	0.0163802	3848/9370/6407	3
GO:0032350	regulation of hormone metabolic process	2/44	38/17913	0.00391895	0.0254311	0.0166248	7124/653	2
GO:0072593	reactive oxygen species metabolic process	4/44	269/17913	0.00421248	0.0272191	0.0177936	7124/2147/1401/730249	4
GO:0045834	positive regulation of lipid metabolic process	3/44	144/17913	0.00529524	0.0328131	0.0214505	7124/2147/9370	3
GO:0016485	protein processing	4/44	295/17913	0.00583009	0.0349805	0.0228674	2147/1511/722/1380	4
GO:1905952	regulation of lipid localization	3/44	151/17913	0.00603929	0.0359504	0.0235014	7124/1401/9370	3
GO:0043312	neutrophil degranulation	5/44	485/17913	0.00648769	0.0380209	0.0248549	3848/5645/1991/1511/5473	5
GO:0002283	neutrophil activation involved in immune response	5/44	488/17913	0.00665553	0.0388295	0.0253835	3848/5645/1991/1511/5473	5
GO:0031343	positive regulation of cell killing	2/44	50/17913	0.0067027	0.0388295	0.0253835	2208/57115	2
GO:1900047	negative regulation of hemostasis	2/44	50/17913	0.0067027	0.0388295	0.0253835	3848/2147	2
GO:0050999	regulation of nitric-oxide synthase activity	2/44	51/17913	0.00696546	0.0400448	0.026178	7124/2208	2
GO:0042119	neutrophil activation	5/44	499/17913	0.00729716	0.0416351	0.0272176	3848/5645/1991/1511/5473	5
GO:0050819	negative regulation of coagulation	2/44	53/17913	0.00750482	0.0424992	0.0277825	3848/2147	2
GO:0030307	positive regulation of cell growth	3/44	166/17913	0.00783616	0.0440456	0.0287934	2147/5645/3558	3
GO:0043405	regulation of MAP kinase activity	4/44	322/17913	0.00790329	0.0440951	0.0288257	7124/1991/5063/9370	4
GO:0071902	positive regulation of protein serine/threonine kinase activity	4/44	322/17913	0.00790329	0.0440951	0.0288257	7124/1991/5063/9370	4
GO:0001959	regulation of cytokine-mediated signaling pathway	3/44	170/17913	0.00836304	0.0463184	0.0302791	7124/26525/9370	3
GO:0048660	regulation of smooth muscle cell proliferation	3/44	172/17913	0.00863414	0.0473229	0.0309358	7124/1991/9370	3
GO:0030888	regulation of B cell proliferation	2/44	57/17913	0.00863831	0.0473229	0.0309358	3635/3558	2
GO:0043525	positive regulation of neuron apoptotic process	2/44	57/17913	0.00863831	0.0473229	0.0309358	7124/5063	2
GO:0070613	regulation of protein processing	3/44	173/17913	0.00877161	0.0478797	0.0312998	2147/722/1380	3
GO:0048659	smooth muscle cell proliferation	3/44	174/17913	0.00891037	0.0484622	0.0316806	7124/1991/9370	3
