# Supplementary material for: A TP53-based immune prognostic model for muscle-invasive bladder cancer
Source: Aging (Albany NY). 2020 Dec 15;13(2):1929–46. doi: 10.18632/aging.202150 (PMC7880361; doi:10.18632/aging.202150)
Supplement: Supplementary Table 6 [file aging-13-202150-s004.xlsx]

## Sheet: S6
Supplementary Table 6. Pathway enrichment analysis of the twenty-five immune genes identified.
ID	Description	GeneRatio(The proportion of gene number enriched to target pathway in gene list containing gene lumps)	BgRatio(The proportion of target pathway genes to total pathway genes)	pvalue	p.adjust	qvalue	geneID	Count
hsa04060	Cytokine-cytokine receptor interaction	2019-08-24	294/7917	1.43945e-06	0.000135308	0.000100004	3598/7124/653/6374/26525/56832/5473/3558	8
hsa04640	Hematopoietic cell lineage	2019-04-24	98/7917	0.000193976	0.00657103	0.00485653	7124/2208/931/1380	4
hsa04061	Viral protein interaction with cytokine and cytokine receptor	2019-04-24	100/7917	0.000209714	0.00657103	0.00485653	7124/6374/5473/3558	4
hsa05133	Pertussis	2019-03-24	76/7917	0.0014884	0.0312893	0.0231253	7124/6374/722	3
hsa04610	Complement and coagulation cascades	2019-03-24	79/7917	0.00166432	0.0312893	0.0231253	2147/722/1380	3
hsa05146	Amoebiasis	2019-03-24	102/7917	0.00345232	0.0489741	0.0361959	7124/4583/1511	3
hsa04660	T cell receptor signaling pathway	2019-03-24	104/7917	0.00364701	0.0489741	0.0361959	7124/5063/3558	3
hsa05330	Allograft rejection	2019-02-24	38/7917	0.00579296	0.0630031	0.0465645	7124/3558	2
hsa05332	Graft-versus-host disease	2019-02-24	41/7917	0.00671978	0.0630031	0.0465645	7124/3558	2
hsa05322	Systemic lupus erythematosus	2019-03-24	133/7917	0.00724741	0.0630031	0.0465645	7124/1991/1511	3
hsa04940	Type I diabetes mellitus	2019-02-24	43/7917	0.00737271	0.0630031	0.0465645	7124/3558	2
hsa04930	Type II diabetes mellitus	2019-02-24	46/7917	0.00840383	0.06583	0.0486538	7124/9370	2
hsa04630	JAK-STAT signaling pathway	2019-03-24	162/7917	0.0124165	0.0897811	0.0663556	3598/56832/3558	3
hsa05321	Inflammatory bowel disease (IBD)	2019-02-24	65/7917	0.0163084	0.103742	0.0766737	7124/3558	2
hsa04664	Fc epsilon RI signaling pathway	2019-02-24	68/7917	0.0177626	0.103742	0.0766737	3635/7124	2
hsa04920	Adipocytokine signaling pathway	2019-02-24	69/7917	0.0182593	0.103742	0.0766737	7124/9370	2
hsa04622	RIG-I-like receptor signaling pathway	2019-02-24	70/7917	0.0187618	0.103742	0.0766737	7124/56832	2
hsa05130	Pathogenic Escherichia coli infection	2019-03-24	201/7917	0.0220357	0.109019	0.0805739	7124/2147/5063	3
hsa05169	Epstein-Barr virus infection	2019-03-24	201/7917	0.0220357	0.109019	0.0805739	7124/2208/1380	3
hsa04662	B cell receptor signaling pathway	2019-02-24	82/7917	0.0252385	0.118621	0.0876704	3635/1380	2
hsa05323	Rheumatoid arthritis	2019-02-24	93/7917	0.0318627	0.132809	0.0981569	7124/6374	2
hsa04350	TGF-beta signaling pathway	2019-02-24	94/7917	0.0324959	0.132809	0.0981569	7124/653	2
hsa04657	IL-17 signaling pathway	2019-02-24	94/7917	0.0324959	0.132809	0.0981569	7124/6374	2
hsa04064	NF-kappa B signaling pathway	2019-02-24	102/7917	0.0377385	0.136116	0.100601	7124/3929	2
hsa05142	Chagas disease (American trypanosomiasis)	2019-02-24	102/7917	0.0377385	0.136116	0.100601	7124/3558	2
hsa04620	Toll-like receptor signaling pathway	2019-02-24	104/7917	0.0390973	0.136116	0.100601	7124/3929	2
hsa04625	C-type lectin receptor signaling pathway	2019-02-24	104/7917	0.0390973	0.136116	0.100601	7124/3558	2
hsa04668	TNF signaling pathway	2019-02-24	112/7917	0.044717	0.150121	0.110952	7124/6374	2
hsa05135	Yersinia infection	2019-02-24	120/7917	0.0506201	0.164079	0.121268	7124/3558	2
hsa04650	Natural killer cell mediated cytotoxicity	2019-02-24	131/7917	0.0591712	0.185403	0.137028	7124/154064	2
hsa04614	Renin-angiotensin system	2019-01-24	23/7917	0.0675378	0.204792	0.151358	1511	1
hsa04932	Non-alcoholic fatty liver disease (NAFLD)	2019-02-24	149/7917	0.0741554	0.217831	0.160995	7124/9370	2
hsa04080	Neuroactive ligand-receptor interaction	2019-03-24	340/7917	0.0816394	0.232549	0.171872	2147/5645/1511	3
hsa01523	Antifolate resistance	2019-01-24	31/7917	0.0899873	0.24168	0.178621	7124	1
hsa05310	Asthma	2019-01-24	31/7917	0.0899873	0.24168	0.178621	7124	1
hsa05164	Influenza A	2019-02-24	170/7917	0.0930071	0.242852	0.179487	7124/5645	2
hsa05152	Tuberculosis	2019-02-24	179/7917	0.101483	0.257822	0.190552	7124/3929	2
hsa05143	African trypanosomiasis	2019-01-24	37/7917	0.106484	0.263407	0.194679	7124	1
hsa04062	Chemokine signaling pathway	2019-02-24	189/7917	0.11115	0.2679	0.198	6374/5473	2
